# Supplementary material for: Membrane contact sites regulate vacuolar fission via sphingolipid metabolism
Source: eLife. 2024 Mar 27;12:RP89938. doi: 10.7554/eLife.89938 (PMC10972560; doi:10.7554/eLife.89938)
Supplement: Figure 1—source data 1. [file elife-89938-fig1-data1.xlsx]

## Sheet: Figure 1A
	Figure 1A
	＊Number of cells (classified by number of vacuoles per cell)										＊two-way ANOVA
		WT										1	2	≧ 3
			1	2	≧ 3	total					WT	87.3874	8.10811	4.5045
		1st	97	9	5	111						89.2562	9.09091	1.65289
		2nd	108	11	2	121						85.5769	11.5385	2.88462
		3rd	89	12	3	104					tcb1Δ2Δ3Δ	43.5644	19.802	36.6337
												33.6634	33.6634	32.6733
		tcb1Δ2Δ3Δ										41	20	39
			1	2	≧ 3	total
		1st	44	20	37	101					分散分析: 繰り返しのある二元配置
		2nd	34	34	33	101
		3rd	41	20	39	100					概要	1	2	≧ 3	合計
											WT
											データの個数	3	3	3	9
	＊Ratio of cells classified into each group (%)										合計	262.221	28.7375	9.04201	300
											平均	87.4068	9.57916	3.014	33.3333
		WT			tcb1Δ2Δ3Δ						分散	3.38455	3.12062	2.04548	1654.94
		1	2	≧ 3	1	2	≧ 3
	1st	87.3874	8.10811	4.5045	43.5644	19.802	36.6337				tcb1Δ2Δ3Δ
	2nd	89.2562	9.09091	1.65289	33.6634	33.6634	32.6733				データの個数	3	3	3	9
	3rd	85.5769	11.5385	2.88462	41	20	39				合計	118.228	73.4653	108.307	300
	average	87.4068	9.57916	3.014	39.4092	24.4884	36.1023				平均	39.4092	24.4884	36.1023	33.3333
	stdev	1.83971	1.76653	1.4302	5.13861	7.94633	3.19666				分散	26.4053	63.1441	10.2186	70.998
	ttest				0.00010834	0.0337828	8.16111e-05
					***	*	***				合計
	stdev.p	1.50212	1.44236	1.16776	4.19566	6.48815	2.61006				データの個数	6	6	6
	se (3)	0.86725	0.832749	0.674204	2.42236	3.74594	1.50692				合計	380.448	102.203	117.349
											平均	63.408	17.0338	19.5582
											分散	703.047	93.192	333.356
	average	1	2	≧ 3
	WT	87.4068	9.57916	3.014
	tcb1Δ2Δ3Δ	39.4092	24.4884	36.1023							分散分析表
											変動要因	変動	自由度	分散	観測された分散比	P-値	F 境界値
	se (3)	1	2	≧ 3							標本	-3.63798e-12	1	-3.63798e-12	-2.01515e-13	#NUM!	4.74723
	WT	0.86725	0.832749	0.674204							列	8159.51	2	4079.75	225.986	2.9932e-10	3.88529
	tcb1Δ2Δ3Δ	2.42236	3.74594	1.50692							交互作用	5431.34	2	2715.67	150.427	3.18452e-09	3.88529
											繰り返し誤差	216.637	12	18.0531
											合計	13807.5	17
