# Supplementary material for: Membrane contact sites regulate vacuolar fission via sphingolipid metabolism
Source: eLife. 2024 Mar 27;12:RP89938. doi: 10.7554/eLife.89938 (PMC10972560; doi:10.7554/eLife.89938)
Supplement: Figure 1—source data 2. [file elife-89938-fig1-data2.xlsx]

## Sheet: Figure 1B
	Figure 1B
	＊Number of cells (classified by number of vacuoles per cell)
		tcb1Δ						tcb2Δ						tcb3Δ
			1	2	≧ 3	total			1	2	≧ 3	total			1	2	≧ 3	total
		1st	31	20	50	101		1st	88	17	5	110		1st	59	30	19	108
		2nd	68	18	19	105		2nd	95	19	6	120		2nd	47	31	25	103
		3rd	64	23	28	115		3rd	91	17	7	115		3rd	47	34	16	97
		tcb1Δ2Δ						tcb1Δ3Δ						tcb2Δ3Δ
			1	2	≧ 3	total			1	2	≧ 3	total			1	2	≧ 3	total
		1st	82	25	12	119		1st	74	19	15	108		1st	59	29	26	114
		2nd	74	27	9	110		2nd	63	22	8	93		2nd	91	25	16	132
		3rd	91	30	13	134		3rd	69	17	7	93		3rd	82	21	19	122
	＊Ratio of cells classified into each group (%)
		WT			tcb1Δ			tcb2Δ			tcb3Δ			tcb1Δ2Δ			tcb1Δ3Δ			tcb2Δ3Δ
		1	2	≧ 3	1	2	≧ 3	1	2	≧ 3	1	2	≧ 3	1	2	≧ 3	1	2	≧ 3	1	2	≧ 3
	1st	87.3874	8.10811	4.5045	30.6931	19.802	49.505	80	15.4545	4.54545	54.6296	27.7778	17.5926	68.9076	21.0084	10.084	68.5185	17.5926	13.8889	51.7544	25.4386	22.807
	2nd	89.2562	9.09091	1.65289	64.7619	17.1429	18.0952	79.1667	15.8333	5	45.6311	30.0971	24.2718	67.2727	24.5455	8.18182	67.7419	23.6559	8.60215	68.9394	18.9394	12.1212
	3rd	85.5769	11.5385	2.88462	55.6522	20	24.3478	79.1304	14.7826	6.08696	48.4536	35.0515	16.4948	67.9104	22.3881	9.70149	74.1935	18.2796	7.52688	67.2131	17.2131	15.5738
	average	87.4068	9.57916	3.014	50.369	18.9816	30.6493	79.4324	15.3568	5.2108	49.5714	30.9755	19.4531	68.0302	22.6473	9.32245	70.1513	19.8427	10.006	62.6356	20.5304	16.834
	stdev.p	1.50212	1.44236	1.16776	14.4015	1.30271	13.5751	0.401649	0.434486	0.646728	3.75772	3.03377	3.43672	0.672773	1.45558	0.821528	2.87581	2.7109	2.78051	7.72641	3.54147	4.45255
	se (3)	0.86725	0.832749	0.674204	8.31471	0.752118	7.83758	0.231892	0.250851	0.373389	2.16952	1.75155	1.98419	0.388426	0.840382	0.474309	1.66035	1.56514	1.60533	4.46085	2.04467	2.57068
	ttest				0.0224078	0.0023882	0.045543	0.00191848	0.00560155	0.080485	0.000189049	0.000841022	0.00305201	7.62471e-05	0.000837093	0.00334432	0.00167278	0.00912543	0.0305349	0.0112407	0.0154743	0.0132012
					*	**		**	**		***	***		***	***		**	**		*	*	*
	average	1	2	> 3		se (3)	1	2	> 3
	WT	87.4068	9.57916	3.014		WT	0.86725	0.832749	0.674204
	tcb1Δ	50.369	18.9816	30.6493		tcb1Δ	8.31471	0.752118	7.83758
	tcb2Δ	79.4324	15.3568	5.2108		tcb2Δ	0.231892	0.250851	0.373389
	tcb3Δ	49.5714	30.9755	19.4531		tcb3Δ	2.16952	1.75155	1.98419
	tcb1Δ2Δ	68.0302	22.6473	9.32245		tcb1Δ2Δ	0.388426	0.840382	0.474309
	tcb1Δ3Δ	70.1513	19.8427	10.006		tcb1Δ3Δ	1.66035	1.56514	1.60533
	tcb2Δ3Δ	62.6356	20.5304	16.834		tcb2Δ3Δ	4.46085	2.04467	2.57068
	＊two-way ANOVA
		1	2	≧ 3						1	2	≧ 3						1	2	≧ 3						1	2	≧ 3						1	2	≧ 3						1	2	≧ 3
	WT	87.39	8.11	4.5					WT	87.39	8.11	4.5					WT	87.39	8.11	4.5					WT	87.39	8.11	4.5					WT	87.39	8.11	4.5					WT	87.39	8.11	4.5
		89.26	9.09	1.65						89.26	9.09	1.65						89.26	9.09	1.65						89.26	9.09	1.65						89.26	9.09	1.65						89.26	9.09	1.65
		85.26	11.58	2.88						85.26	11.58	2.88						85.26	11.58	2.88						85.26	11.58	2.88						85.26	11.58	2.88						85.26	11.58	2.88
	tcb1Δ	30.69	19.8	49.5					tcb2Δ	80	15.46	4.55					tcb3Δ	54.63	27.78	1.76					tcb1Δ2Δ	68.91	21.01	10.08					tcb1Δ3Δ	68.52	17.59	13.89					tcb2Δ3Δ	51.75	25.44	22.81
		64.76	17.14	18.1						79.17	15.83	5						45.63	30.1	24.27						67.27	24.55	8.18						67.74	23.66	8.6						68.94	18.94	12.12
		55.65	20	24.35						79.13	14.78	6.09						48.45	35.05	16.49						67.91	22.34	9.7						74.19	18.28	7.53						67.21	17.21	15.57
	分散分析: 繰り返しのある二元配置								分散分析: 繰り返しのある二元配置								分散分析: 繰り返しのある二元配置								分散分析: 繰り返しのある二元配置								分散分析: 繰り返しのある二元配置								分散分析: 繰り返しのある二元配置
	概要	1	2	≧ 3	合計				概要	1	2	≧ 3	合計				概要	1	2	≧ 3	合計				概要	1	2	≧ 3	合計				概要	1	2	3<	合計				概要	1	2	≧ 3	合計
	WT								WT								WT								WT								WT								WT
	データの個数	3	3	3	9				データの個数	3	3	3	9				データの個数	3	3	3	9				データの個数	3	3	3	9				データの個数	3	3	3	9				データの個数	3	3	3	9
	合計	261.91	28.78	9.03	299.72				合計	261.91	28.78	9.03	299.72				合計	261.91	28.78	9.03	299.72				合計	261.91	28.78	9.03	299.72				合計	261.91	28.78	9.03	299.72				合計	261.91	28.78	9.03	299.72
	平均	87.3033	9.59333	3.01	33.3022				平均	87.3033	9.59333	3.01	33.3022				平均	87.3033	9.59333	3.01	33.3022				平均	87.3033	9.59333	3.01	33.3022				平均	87.3033	9.59333	3.01	33.3022				平均	87.3033	9.59333	3.01	33.3022
	分散	4.00563	3.20023	2.0433	1650.76				分散	4.00563	3.20023	2.0433	1650.76				分散	4.00563	3.20023	2.0433	1650.76				分散	4.00563	3.20023	2.0433	1650.76				分散	4.00563	3.20023	2.0433	1650.76				分散	4.00563	3.20023	2.0433	1650.76
	tcb1Δ								tcb2Δ								tcb3Δ								tcb1Δ2Δ								tcb1Δ3Δ								tcb2Δ3Δ
	データの個数	3	3	3	9				データの個数	3	3	3	9				データの個数	3	3	3	9				データの個数	3	3	3	9				データの個数	3	3	3	9				データの個数	3	3	3	9
	合計	151.1	56.94	91.95	299.99				合計	238.3	46.07	15.64	300.01				合計	148.71	92.93	42.52	284.16				合計	204.09	67.9	27.96	299.95				合計	210.45	59.53	30.02	300				合計	187.9	61.59	50.5	299.99
	平均	50.3667	18.98	30.65	33.3322				平均	79.4333	15.3567	5.21333	33.3344				平均	49.57	30.9767	14.1733	31.5733				平均	68.03	22.6333	9.32	33.3278				平均	70.15	19.8433	10.0067	33.3333				平均	62.6333	20.53	16.8333	33.3322
	分散	311.126	2.5492	276.258	336.241				分散	0.241233	0.283633	0.627033	1214.95				分散	21.1908	13.7896	130.7	276.544				分散	0.6832	3.19743	1.0108	711.844				分散	12.3933	11.0442	11.5964	789.351				分散	89.5834	18.8293	29.766	520.044
	合計								合計								合計								合計								合計								合計
	データの個数	6	6	6					データの個数	6	6	6					データの個数	6	6	6					データの個数	6	6	6					データの個数	6	6	6					データの個数	6	6	6
	合計	413.01	85.72	100.98					合計	500.21	74.85	24.67					合計	410.62	121.71	51.55					合計	466	96.68	36.99					合計	472.36	88.31	39.05					合計	449.81	90.37	59.53
	平均	68.835	14.2867	16.83					平均	83.3683	12.475	4.11167					平均	68.4367	20.285	8.59167					平均	77.6667	16.1133	6.165					平均	78.7267	14.7183	6.50833					平均	74.9683	15.0617	9.92167
	分散	535.348	28.7326	340.511					分散	20.2798	11.3584	2.52454					分散	437.22	143.97	90.4834					分散	113.314	53.5715	13.1665					分散	94.8306	37.2165	20.1419					分散	220.018	44.695	70.0491
	分散分析表								分散分析表								分散分析表								分散分析表								分散分析表								分散分析表
	変動要因	変動	自由度	分散	観測された分散比	P-値	F 境界値		変動要因	変動	自由度	分散	観測された分散比	P-値	F 境界値		変動要因	変動	自由度	分散	観測された分散比	P-値	F 境界値		変動要因	変動	自由度	分散	観測された分散比	P-値	F 境界値		変動要因	変動	自由度	分散	観測された分散比	P-値	F 境界値		変動要因	変動	自由度	分散	観測された分散比	P-値	F 境界値
	標本	0.00405	1	0.00405	4.05553e-05	0.995024	4.74723		標本	0.00467222	1	0.00467222	0.00269524	0.95945	4.74723		標本	13.4508	1	13.4508	0.461354	0.509881	4.74723		標本	0.00293889	1	0.00293889	0.001247	0.972411	4.74723		標本	0.00435556	1	0.00435556	0.000590142	0.981018	4.74723		標本	0.00405	1	0.00405	0.000164826	0.989968	4.74723
	列	11373	2	5686.51	56.9427	7.50301e-07	3.88529		列	22754.9	2	11377.4	6563.23	5.80526e-19	3.88529		列	12073.5	2	6036.74	207.057	4.98807e-10	3.88529		列	18000.5	2	9000.27	3818.91	1.48999e-17	3.88529		列	18759.9	2	9379.96	1270.91	1.07635e-14	3.88529		列	15692.6	2	7846.3	319.327	3.93535e-11	3.88529
	交互作用	3324.59	2	1662.3	16.6456	0.000345939	3.88529		交互作用	150.007	2	75.0034	43.2667	3.26276e-06	3.88529		交互作用	2995.06	2	1497.53	51.3644	1.30934e-06	3.88529		交互作用	871.976	2	435.988	184.994	9.61144e-10	3.88529		交互作用	672.375	2	336.187	45.5506	2.48602e-06	3.88529		交互作用	1378.95	2	689.476	28.0602	2.9883e-05	3.88529
	繰り返し誤差	1198.36	12	99.8637					繰り返し誤差	20.8021	12	1.73351					繰り返し誤差	349.86	12	29.155					繰り返し誤差	28.2812	12	2.35677					繰り返し誤差	88.5663	12	7.38052					繰り返し誤差	294.856	12	24.5713
	合計	15896	17						合計	22925.7	17						合計	15431.8	17						合計	18900.8	17						合計	19520.9	17						合計	17366.4	17
