# Supplementary material for: Membrane contact sites regulate vacuolar fission via sphingolipid metabolism
Source: eLife. 2024 Mar 27;12:RP89938. doi: 10.7554/eLife.89938 (PMC10972560; doi:10.7554/eLife.89938)
Supplement: Figure 1—source data 3. [file elife-89938-fig1-data3.xlsx]

## Sheet: Figure 1C
	Figure 1C
	＊Number of cells (classified by number of vacuoles per cell)																	＊Number of cells (classified by number of vacuoles per cell)
	WT	none																tcb1Δ2Δ3Δ
			1	2	≧ 3	total													none						SDW
		1st	92	4	4	100														1	2	≧ 3	total			1	2	≧ 3	total
		2nd	94	4	2	100													1st	16	18	65	99		1st	41	29	30	100
		3rd	95	4	1	100													2nd	9	15	76	100		2nd	35	22	40	97
																			3rd	8	23	66	97		3rd	40	20	39	99
		SDW																	4th	181	97	37	315		4th	264	78	59	401
			1	2	≧ 3	total													5th	144	89	11	244		5th	242	67	8	317
		1st	118	3	0	121													6th	176	113	75	364		6th	276	78	23	377
		2nd	119	3	0	122													7th	165	108	32	305		7th	177	35	14	226
		3rd	94	8	0	102
																			none						Rap
		Rap																		1	2	≧ 3	total			1	2	≧ 3	total
			1	2	≧ 3	total													1st	43	19	37	99		1st	79	17	4	100
		1st	185	23	5	213													2nd	34	34	33	101		2nd	66	22	12	100
		2nd	177	26	4	207													3rd	41	20	39	100		3rd	67	20	12	99
		3rd	255	26	4	285
	＊Ratio of cells classified into each group (%)																	＊Ratio of cells classified into each group (%)
		none			SDW			Rap												none			SDW			Rap
		1	2	≧ 3	1	2	≧ 3	1	2	≧ 3										1	2	≧ 3	1	2	≧ 3	1	2	≧ 3
	1st	92	4	4	97.5207	2.47934	0	86.8545	10.7981	2.34742									1st	16.1616	18.1818	65.6566	41	29	30
	2nd	94	4	2	97.541	2.45902	0	85.5072	12.5604	1.93237									2nd	9	15	76	36.0825	22.6804	41.2371
	3rd	95	4	1	92.1569	7.84314	0	89.4737	9.12281	1.40351									3rd	8.24742	23.7113	68.0412	40.404	20.202	39.3939
																			4th	57.4603	30.7937	11.746	65.8354	19.4514	14.7132
	n=	3	3	3	3	3	3	3	3	3									5th	59.0164	36.4754	4.5082	76.3407	21.1356	2.52366
																			6th	48.3516	31.044	20.6044	73.2095	20.6897	6.1008
																			7th	54.0984	35.4098	10.4918	78.3186	15.4867	6.19469
																			1st	43.4343	19.1919	37.3737				79	17	4
																			2nd	33.6634	33.6634	32.6733				66	22	12
	average	93.6667	4	2.33333	95.7395	4.2605	0	87.2785	10.8271	1.89443									3rd	41	20	39				67.6768	20.202	12.1212
	stdev	1.52753	0	1.52753	3.10267	3.10267	0	2.01693	1.71897	0.473097
	stdev.p	1.24722	0	1.24722	2.53332	2.53332	0	1.64681	1.40354	0.386282									n=	10	10	10	7	7	7	3	3	3
	se (n)	0.720082	0	0.720082	1.46261	1.46261	0	0.950788	0.810332	0.22302
	ttest				0.357832	0.891412	0.0572352	0.0119377	0.00233994	0.659306									average	37.0433	26.3471	36.6095	58.7415	21.2351	20.0233	70.8923	19.734	9.37374
					n.s.	n.s.	n.s.	*	**	n.s.									stdev	19.5449	7.98564	25.8028	18.7843	4.08213	16.5544	7.07139	2.53264	4.65419
																			stdev.p	18.5419	7.57584	24.4787	17.3909	3.77932	15.3264	5.77376	2.06789	3.80013
																			se (n)	5.86347	2.39569	7.74085	6.57313	1.42845	5.79282	3.33348	1.1939	2.19401
	average	1	2	≧ 3															ttest				0.0702775	0.115192	0.238632	0.00330452	0.407082	0.00120439
	none	93.6667	4	2.33333																			n.s.	n.s.	n.s.	**	n.s.	**
	SDW	95.7395	4.2605	0
	Rap	87.2785	10.8271	1.89443
																			average	1	2	≧ 3
	se (n)	1	2	≧ 3															none	37.0433	26.3471	36.6095
	none	0.720082	0	0.720082															SDW	58.7415	21.2351	20.0233
	SDW	1.46261	1.46261	0															Rap	70.8923	19.734	9.37374
	Rap	0.950788	0.810332	0.22302
																			se (n)	1	2	≧ 3
																			none	5.86347	2.39569	7.74085
																			SDW	6.57313	1.42845	5.79282
																			Rap	3.33348	1.1939	2.19401
	＊two-way ANOVA																	＊two-way ANOVA
		1	2	≧ 3						1	2	≧ 3							1	2	≧ 3						1	2	≧ 3
	none	92	4	4					none	92	4	4						none	16.1616	18.1818	65.6566					none	43.4343	19.1919	37.3737
		94	4	2						94	4	2							9	15	76						33.6634	33.6634	32.6733
		95	4	1						95	4	1							8.24742	23.7113	68.0412						41	20	39
	SDW	97.5207	2.47934	0					Rap	86.8545	10.7981	2.34742							57.4603	30.7937	11.746					Rap	79	17	4
		97.541	2.45902	0						85.5072	12.5604	1.93237							59.0164	36.4754	4.5082						66	22	12
		92.1569	7.84314	0						89.4737	9.12281	1.40351							48.3516	31.044	20.6044						67.6768	20.202	12.1212
																			54.0984	35.4098	10.4918
																		SDW	41	29	30
	分散分析: 繰り返しのある二元配置								分散分析: 繰り返しのある二元配置										36.0825	22.6804	41.2371
																			40.404	20.202	39.3939
	概要	1	2	≧ 3	合計				概要	1	2	≧ 3	合計						65.8354	19.4514	14.7132
	none								none										76.3407	21.1356	2.52366
	データの個数	3	3	3	9				データの個数	3	3	3	9						73.2095	20.6897	6.1008
	合計	281	12	7	300				合計	281	12	7	300						78.3186	15.4867	6.19469
	平均	93.6667	4	2.33333	33.3333				平均	93.6667	4	2.33333	33.3333
	分散	2.33333	0	2.33333	2049.25				分散	2.33333	0	2.33333	2049.25					分散分析: 繰り返しのある二元配置								分散分析: 繰り返しのある二元配置
	SDW								Rap									概要	1	2	≧ 3	合計				概要	1	2	≧ 3	合計
	データの個数	3	3	3	9				データの個数	3	3	3	9					none								none
	合計	287.219	12.7815	0	300				合計	261.835	32.4813	5.68329	300					データの個数	7	7	7	21				データの個数	3	3	3	9
	平均	95.7395	4.2605	0	33.3333				平均	87.2785	10.8271	1.89443	33.3333					合計	252.336	190.616	257.048	700				合計	118.098	72.8553	109.047	300
	分散	9.62658	9.62658	0	2198.89				分散	4.06799	2.95487	0.22382	1653.69					平均	36.048	27.2309	36.7212	33.3333				平均	39.3659	24.2851	36.349	33.3333
																		分散	560.527	70.5761	995.032	507.471				分散	25.8707	66.1272	10.7944	73.4569
	合計								合計
	データの個数	6	6	6					データの個数	6	6	6						SDW								Rap
	合計	568.219	24.7815	7					合計	542.835	44.4813	12.6833						データの個数	7	7	7	21				データの個数	3	3	3	9
	平均	94.7031	4.13025	1.16667					平均	90.4726	7.41355	2.11388						合計	411.191	148.646	140.163	700				合計	212.677	59.202	28.1212	300
	分散	6.07296	3.87099	2.56667					分散	14.8033	15.1648	1.08065						平均	58.7415	21.2351	20.0233	33.3333				平均	70.8923	19.734	9.37374	33.3333
																		分散	352.849	16.6638	274.047	532.253				分散	50.0045	6.41428	21.6615	833.149
	分散分析表								分散分析表									合計								合計
	変動要因	変動	自由度	分散	観測された分散比	P-値	F 境界値		変動要因	変動	自由度	分散	観測された分散比	P-値	F 境界値			データの個数	14	14	14					データの個数	6	6	6
	標本	-7.27596e-12	1	-7.27596e-12	-1.82509e-12	#NUM!	4.74723		標本	0	1	0	0	1	4.74723			合計	663.527	339.262	397.212					合計	330.774	132.057	137.168
	列	33922.6	2	16961.3	4254.53	7.80054e-18	3.88529		列	29468.3	2	14734.1	7420.66	2.78066e-19	3.88529			平均	47.3948	24.233	28.3723					平均	55.1291	22.0096	22.8614
	交互作用	14.7134	2	7.35671	1.84534	0.200095	3.88529		交互作用	131.417	2	65.7084	33.0931	1.30708e-05	3.88529			分散	560.212	49.9431	660.795					分散	328.523	35.2303	231.282
	繰り返し誤差	47.8397	12	3.98664					繰り返し誤差	23.8267	12	1.98556
	合計	33985.1	17						合計	29623.5	17							分散分析表								分散分析表
																		変動要因	変動	自由度	分散	観測された分散比	P-値	F 境界値		変動要因	変動	自由度	分散	観測された分散比	P-値	F 境界値
																		標本	0	1	0	0	1	4.11317		標本	9.09495e-13	1	9.09495e-13	3.01702e-14	1	4.74723
																		列	4272.13	2	2136.06	5.64674	0.00736245	3.25945		列	4277.67	2	2138.83	70.9505	2.24719e-07	3.88529
																		交互作用	2904.18	2	1452.09	3.83863	0.030821	3.25945		交互作用	2613.43	2	1306.72	43.3471	3.23102e-06	3.88529
																		繰り返し誤差	13618.2	36	378.283					繰り返し誤差	361.745	12	30.1454
																		合計	20794.5	41						合計	7252.85	17
