# Supplementary material for: Membrane contact sites regulate vacuolar fission via sphingolipid metabolism
Source: eLife. 2024 Mar 27;12:RP89938. doi: 10.7554/eLife.89938 (PMC10972560; doi:10.7554/eLife.89938)
Supplement: Figure 1—source data 4. [file elife-89938-fig1-data4.xlsx]

## Sheet: Figure 1D
	Figure 1D
	＊original signal amount of Phosphorylated Sch9 (Sch9-P) and Non-phosphorylated Sch9 (Sch9)								＊comparison to untreated WT cells
			Sch9-P	Sch9	Total Sch9		Sch9-P(%)		relative to WT
												WT	WT+Rap	tcb123Δ
	#1	WT	3876.86	15030.4	18907.2		20.5046		1		#1	1	0.386397	1.01028
		WT+Rap	1531.23	17795.4	19326.6		7.92294		0.386397		#2	1	0.295448	1.16083
		tcb123Δ	2037.45	7797.92	9835.37		20.7155		1.01028		#3	1	0.427976	1.05594
											average	1	0.36994	1.07569
											stdev.p	0	0.0553418	0.0630272
	#2	WT	8737.84	50172.5	58910.4		14.8324		1		se (3)	0	0.0319516	0.0363888
		WT+Rap	1841.01	40170	42011.1		4.38221		0.295448		ttest			0.164692
		tcb123Δ	7062.41	33955.2	41017.6		17.218		1.16083					n.s.
	#3	WT	15343.9	19322.8	34666.7		44.2612		1
		WT+Rap	5143.9	22011.1	27155		18.9427		0.427976
		tcb123Δ	19530	22256.8	41786.8		46.7372		1.05594
