# Supplementary material for: Membrane contact sites regulate vacuolar fission via sphingolipid metabolism
Source: eLife. 2024 Mar 27;12:RP89938. doi: 10.7554/eLife.89938 (PMC10972560; doi:10.7554/eLife.89938)
Supplement: Figure 2—source data 1. [file elife-89938-fig2-data1.xlsx]

## Sheet: Figure 2B
	Figure 2B
	＊Number of cells (classified by number of vacuoles per cell)
	(i) Tcb1 Tcb2 Tcb3						(ii) Tcb1 Tcb2 tcb3Δ						(iii) Tcb1 Tcb2 Tcb3(Full)-GBP						(iv) Tcb1 Tcb2 Tcb3(TM-SMP)-GBP						(v) Tcb1 Tcb2 Tcb3(TM)-GBP						(vi) tcb1Δ tcb2Δ Tcb3(TM)-GBP
		1	2	≧ 3	total			1	2	≧ 3	total			1	2	≧ 3	total			1	2	≧ 3	total			1	2	≧ 3	total			1	2	≧ 3	total
	1st	101	4	5	110		1st	67	26	15	108		1st	88	7	5	100		1st	82	20	4	106		1st	95	14	6	115		1st	51	24	28	103
	2nd	77	13	9	99		2nd	42	31	31	104		2nd	78	14	6	98		2nd	72	19	12	103		2nd	92	13	2	107		2nd	63	25	19	107
	3rd	75	9	8	92		3rd	68	25	17	110		3rd	81	5	7	93		3rd	85	11	6	102		3rd	87	11	0	98		3rd	58	32	11	101
	＊Ratio of cells classified into each group (%)
		(i)			(ii)			(iii)			(iv)			(v)			(vi)
		1	2	≧ 3	1	2	≧ 3	1	2	≧ 3	1	2	≧ 3	1	2	≧ 3	1	2	≧ 3
	1st	91.8182	3.63636	4.54545	62.037	24.0741	13.8889	88	7	5	77.3585	18.8679	3.77358	82.6087	12.1739	5.21739	49.5146	23.301	27.1845
	2nd	77.7778	13.1313	9.09091	40.3846	29.8077	29.8077	79.5918	14.2857	6.12245	69.9029	18.4466	11.6505	85.9813	12.1495	1.86916	58.8785	23.3645	17.757
	3rd	81.5217	9.78261	8.69565	61.8182	22.7273	15.4545	87.0968	5.37634	7.52688	83.3333	10.7843	5.88235	88.7755	11.2245	0	57.4257	31.6832	10.8911
	average	83.7059	8.8501	7.44401	54.7466	25.5363	19.717	84.8962	8.88735	6.21644	76.8649	16.0329	7.10214	85.7885	11.8493	2.36218	55.2729	26.1162	18.6109
	stdev.p	5.93639	3.93198	2.05593	10.1559	3.06994	7.16374	3.76884	3.87434	1.03373	5.49404	3.71533	3.32939	2.52128	0.441928	2.15833	4.11475	3.93652	6.67909
	se (3)	3.42738	2.27013	1.18699	5.86349	1.77243	4.13599	2.17594	2.23685	0.596827	3.17199	2.14505	1.92223	1.45566	0.255147	1.24611	2.37565	2.27275	3.85617
	ttest				0.0253181	0.00910087	0.0803537	0.822567	0.992841	0.492584	0.297717	0.133624	0.907628	0.671617	0.3441	0.073474	0.00510019	0.0117949	0.0866992
					*	**	n.s.	n.s.	n.s.	n.s.	n.s.	n.s.	n.s.	n.s.	n.s.	n.s.	**	*	n.s.
	average	1	2	≧ 3		se (3)	1	2	≧ 3
	(i)	83.7059	8.8501	7.44401		(i)	3.42738	2.27013	1.18699
	(ii)	54.7466	25.5363	19.717		(ii)	5.86349	1.77243	4.13599
	(iii)	84.8962	8.88735	6.21644		(iii)	2.17594	2.23685	0.596827
	(iv)	76.8649	16.0329	7.10214		(iv)	3.17199	2.14505	1.92223
	(v)	85.7885	11.8493	2.36218		(v)	1.45566	0.255147	1.24611
	(vi)	55.2729	26.1162	18.6109		(vi)	2.37565	2.27275	3.85617
	＊two-way ANOVA
																																											(Figure 1B)				(Figure 1A)
		(i)			(ii)			(iii)			(iv)			(v)			(vi)																										tcb1Δ2Δ				tcb1Δ2Δ3Δ
		1	2	≧ 3	1	2	≧ 3	1	2	≧ 3	1	2	≧ 3	1	2	≧ 3	1	2	≧ 3																								1	2	≧ 3		1	2	≧ 3
	1st	91.8182	3.63636	4.54545	62.037	24.0741	13.8889	88	7	5	77.3585	18.8679	3.77358	82.6087	12.1739	5.21739	49.5146	23.301	27.1845																								68.91	21.01	10.08		43.4343	19.1919	37.3737
	2nd	77.7778	13.1313	9.09091	40.3846	29.8077	29.8077	79.5918	14.2857	6.12245	69.9029	18.4466	11.6505	85.9813	12.1495	1.86916	58.8785	23.3645	17.757																								67.27	24.55	8.18		33.6634	33.6634	32.6733
	3rd	81.5217	9.78261	8.69565	61.2613	22.5225	15.3153	87.0968	5.37634	7.52688	83.3333	10.7843	5.88235	88.7755	11.2245	0	57.4257	31.6832	10.8911																								67.91	22.34	9.7		41	20	39
		1	2	≧ 3						1	2	≧ 3						1	2	≧ 3						1	2	≧ 3						1	2	≧ 3								1	2	≧ 3
	(i)	91.8182	3.63636	4.54545					(i)	91.8182	3.63636	4.54545					(i)	91.8182	3.63636	4.54545					(i)	91.8182	3.63636	4.54545					(i)	91.8182	3.63636	4.54545							tcb1Δ2Δ	68.91	21.01	10.08
		77.7778	13.1313	9.09091						77.7778	13.1313	9.09091						77.7778	13.1313	9.09091						77.7778	13.1313	9.09091						77.7778	13.1313	9.09091								67.27	24.55	8.18
		81.5217	9.78261	8.69565						81.5217	9.78261	8.69565						81.5217	9.78261	8.69565						81.5217	9.78261	8.69565						81.5217	9.78261	8.69565								67.91	22.34	9.7
	(ii)	62.037	24.0741	13.8889					(iii)	88	7	5					(iv)	77.3585	18.8679	3.77358					(v)	82.6087	12.1739	5.21739					(vi)	49.5146	23.301	27.1845							(vi)	49.5146	23.301	27.1845
		40.3846	29.8077	29.8077						79.5918	14.2857	6.12245						69.9029	18.4466	11.6505						85.9813	12.1495	1.86916						58.8785	23.3645	17.757								58.8785	23.3645	17.757
		61.2613	22.5225	15.3153						87.0968	5.37634	7.52688						83.3333	10.7843	5.88235						88.7755	11.2245	0						57.4257	31.6832	10.8911								57.4257	31.6832	10.8911
	分散分析: 繰り返しのある二元配置								分散分析: 繰り返しのある二元配置								分散分析: 繰り返しのある二元配置								分散分析: 繰り返しのある二元配置								分散分析: 繰り返しのある二元配置										分散分析: 繰り返しのある二元配置
	概要	1	2	≧ 3	合計				概要	1	2	≧ 3	合計				概要	1	2	≧ 3	合計				概要	1	2	≧ 3	合計				概要	1	2	≧ 3	合計						概要	1	2	≧ 3	合計
	(i)								(i)								(i)								(i)								(i)										tcb1Δ2Δ
	データの個数	3	3	3	9				データの個数	3	3	3	9				データの個数	3	3	3	9				データの個数	3	3	3	9				データの個数	3	3	3	9						データの個数	3	3	3	9
	合計	251.118	26.5503	22.332	300				合計	251.118	26.5503	22.332	300				合計	251.118	26.5503	22.332	300				合計	251.118	26.5503	22.332	300				合計	251.118	26.5503	22.332	300						合計	204.09	67.9	27.96	299.95
	平均	83.7059	8.8501	7.44401	33.3333				平均	83.7059	8.8501	7.44401	33.3333				平均	83.7059	8.8501	7.44401	33.3333				平均	83.7059	8.8501	7.44401	33.3333				平均	83.7059	8.8501	7.44401	33.3333						平均	68.03	22.6333	9.32	33.3278
	分散	52.8612	23.1907	6.34025	1448.25				分散	52.8612	23.1907	6.34025	1448.25				分散	52.8612	23.1907	6.34025	1448.25				分散	52.8612	23.1907	6.34025	1448.25				分散	52.8612	23.1907	6.34025	1448.25						分散	0.6832	3.19743	1.0108	711.844
	(ii)								(iii)								(iv)								(v)								(vi)										(vi)
	データの個数	3	3	3	9				データの個数	3	3	3	9				データの個数	3	3	3	9				データの個数	3	3	3	9				データの個数	3	3	3	9						データの個数	3	3	3	9
	合計	163.683	76.4043	59.0119	299.099				合計	254.689	26.6621	18.6493	300				合計	230.595	48.0988	21.3064	300				合計	257.366	35.5479	7.08655	300				合計	165.819	78.3486	55.8326	300						合計	165.819	78.3486	55.8326	300
	平均	54.561	25.4681	19.6706	33.2332				平均	84.8962	8.88735	6.21644	33.3333				平均	76.8649	16.0329	7.10214	33.3333				平均	85.7885	11.8493	2.36218	33.3333				平均	55.2729	26.1162	18.6109	33.3333						平均	55.2729	26.1162	18.6109	33.3333
	分散	150.877	14.7259	77.5787	322.963				分散	21.3062	22.5158	1.60291	1508.23				分散	45.2768	20.7055	16.6273	1101.54				分散	9.53528	0.292951	6.9876	1568.82				分散	25.3968	23.2443	66.9153	310.208						分散	25.3968	23.2443	66.9153	310.208
	合計								合計								合計								合計								合計										合計
	データの個数	6	6	6					データの個数	6	6	6					データの個数	6	6	6					データの個数	6	6	6					データの個数	6	6	6							データの個数	6	6	6
	合計	414.801	102.955	81.3439					合計	505.806	53.2123	40.9813					合計	481.712	74.6491	43.6384					合計	508.483	62.0982	29.4186					合計	416.937	104.899	78.1646							合計	369.909	146.249	83.7926
	平均	69.1334	17.1591	13.5573					平均	84.3011	8.86872	6.83022					平均	80.2854	12.4415	7.27307					平均	84.7472	10.3497	4.90309					平均	69.4894	17.4832	13.0274							平均	61.6515	24.3748	13.9654
	分散	336.323	98.014	78.4147					分散	30.092	18.283	3.62934					分散	53.2949	33.0365	9.22208					分散	26.2597	12.0921	13.0786					分散	273.833	108.01	66.7118							分散	59.2548	14.2158	53.0664
	分散分析表								分散分析表								分散分析表								分散分析表								分散分析表										分散分析表
	変動要因	変動	自由度	分散	観測された分散比	P-値	F 境界値		変動要因	変動	自由度	分散	観測された分散比	P-値	F 境界値		変動要因	変動	自由度	分散	観測された分散比	P-値	F 境界値		変動要因	変動	自由度	分散	観測された分散比	P-値	F 境界値		変動要因	変動	自由度	分散	観測された分散比	P-値	F 境界値				変動要因	変動	自由度	分散	観測された分散比	P-値	F 境界値
	標本	0.0450901	1	0.0450901	0.000830966	0.977477	4.74723		標本	0	1	0	0	1	4.74723		標本	0	1	0	0	1	4.74723		標本	0	1	0	0	1	4.74723		標本	1.81899e-12	1	1.81899e-12	5.51352e-14	1	4.74723				標本	0.000138889	1	0.000138889	6.91862e-06	0.997945	4.74723
	列	11606	2	5803.01	106.944	2.24769e-08	3.88529		列	23391.8	2	11695.9	549.031	1.59589e-12	3.88529		列	19920.6	2	9960.31	362.189	1.87275e-11	3.88529		列	23879.5	2	11939.7	722.104	3.13147e-13	3.88529		列	11824.9	2	5912.46	179.212	1.15582e-09	3.88529				列	7543.73	2	3771.87	187.892	8.78107e-10	3.88529
	交互作用	1912.57	2	956.284	17.6233	0.000268447	3.88529		交互作用	4.38768	2	2.19384	0.102983	0.902931	3.88529		交互作用	147.764	2	73.882	2.68659	0.108595	3.88529		交互作用	58.7362	2	29.3681	1.77615	0.211017	3.88529		交互作用	1846.88	2	923.438	27.9902	3.02539e-05	3.88529				交互作用	391.789	2	195.895	9.75832	0.00304683	3.88529
	繰り返し誤差	651.148	12	54.2623					繰り返し誤差	255.634	12	21.3028					繰り返し誤差	330.003	12	27.5003					繰り返し誤差	198.416	12	16.5347					繰り返し誤差	395.897	12	32.9914							繰り返し誤差	240.896	12	20.0746
	合計	14169.8	17						合計	23651.9	17						合計	20398.4	17						合計	24136.6	17						合計	14067.7	17								合計	8176.42	17
