# Supplementary material for: Membrane contact sites regulate vacuolar fission via sphingolipid metabolism
Source: eLife. 2024 Mar 27;12:RP89938. doi: 10.7554/eLife.89938 (PMC10972560; doi:10.7554/eLife.89938)
Supplement: Figure 3—source data 3. [file elife-89938-fig3-data3.xlsx]

## Sheet: Figure 3A
	Figure 3A
	＊Original Signal Intensity							＊Relative amount (% to WT)
			#1	#2	#3	#4
	Total	WT	205527	170974	247483	236781
		tcb1Δ2Δ3Δ	236686	199338	255731	291844
								#1	#2	#3	#4	average	se(4)	Ttest		average	Ceramides	DHS	PE	PHS	PC	PI	IPC, MIPC	PHS-1P, DHS-1P
	Ceramides	WT	44278.9	34244.6	50372.7	40318.9		100	100	100	100	100	0			WT	100	100	100	100	100	100	100	100
		tcb1Δ2Δ3Δ	53220	41105.2	53929	52446.6		120.193	120.034	107.06	130.079	119.342	4.08764	0.00637322		tcb1Δ2Δ3Δ	119.342	100.409	125.727	128.052	114.222	122.078	120.046	174.927
	DHS	WT	74820.9	37602.6	87944	75752.4		100	100	100	100	100	0			se(4)	Ceramides	DHS	PE	PHS	PC	PI	IPC, MIPC	PHS-1P, DHS-1P
		tcb1Δ2Δ3Δ	75663.1	37809	78580.2	83788		101.126	100.549	89.3526	110.608	100.409	3.76491	0.928154		WT	0	0	0	0	0	0	0	0
																tcb1Δ2Δ3Δ	4.08764	3.76491	7.24715	5.42099	6.41088	5.55351	2.44444	13.7535
	PE	WT	8965.87	6329.15	5566.67	5374.85		100	100	100	100	100	0
		tcb1Δ2Δ3Δ	12628.5	8402.16	5681.53	6838.95		140.85	132.753	102.063	127.24	125.727	7.24715	0.0218214		Ttest	0.00637322	0.928154	0.0218214	0.00418609	0.103086	0.0137522	0.000391435	0.00326475
																	**	n.s.	*	**	n.s.	*	***	**
	PHS	WT	15314.8	17221.7	16713.9	15145.4		100	100	100	100	100	0
		tcb1Δ2Δ3Δ	19518	22709.7	18626.9	21423.2		127.445	131.867	111.446	141.45	128.052	5.42099	0.00418609
	PC	WT	357.11	1049.31	1791.24	1413.87		100	100	100	100	100	0
		tcb1Δ2Δ3Δ	468.34	1165.49	1715.92	1680.74		131.147	111.072	95.7951	118.875	114.222	6.41088	0.103086
	PI	WT	12384.1	8462.73	10438.7	10467.7		100	100	100	100	100	0
		tcb1Δ2Δ3Δ	14418.9	10562.7	11329.7	14501		116.431	124.815	108.536	138.531	122.078	5.55351	0.0137522
	IPC, MIPC	WT	36904.4	54452.9	47239.2	58966.5		100	100	100	100	100	0
		tcb1Δ2Δ3Δ	44945	61434.2	56323.6	74502.3		121.788	112.821	119.23	126.347	120.046	2.44444	0.000391435
	LCB-1P	WT	3113	2819.35	4816.64	6038.57		100	100	100	100	100	0
		tcb1Δ2Δ3Δ	4712.96	6253.97	7890.33	9823.31		151.396	221.823	163.814	162.676	174.927	13.7535	0.00326475
