# Supplementary material for: Membrane contact sites regulate vacuolar fission via sphingolipid metabolism
Source: eLife. 2024 Mar 27;12:RP89938. doi: 10.7554/eLife.89938 (PMC10972560; doi:10.7554/eLife.89938)
Supplement: Figure 3—source data 4. [file elife-89938-fig3-data4.xlsx]

## Sheet: Figure 3B
	Figure 3B
	＊Number of cells (classified by number of vacuoles per cell)									＊two-way ANOVA
		WT
			1	2	≧ 3	total					1	2	≧ 3
		1st	118	10	2	130				WT	90.7692	7.69231	1.53846
		2nd	117	7	0	124					94.3548	5.64516	0
		3rd	101	5	1	107					94.3925	4.6729	0.934579
										lag1Δlac1Δ	23.8938	36.2832	39.823
											33.0827	36.8421	30.0752
		lag1Δlac1Δ									28.5714	40.1786	31.25
			1	2	≧ 3	total
		1st	27	41	45	113				分散分析: 繰り返しのある二元配置
		2nd	44	49	40	133
		3rd	32	45	35	112				概要	1	2	≧ 3	合計
										WT
										データの個数	3	3	3	9
										合計	279.517	18.0104	2.47304	300
	＊Ratio of cells classified into each group (%)									平均	93.1722	6.00346	0.824347	33.3333
										分散	4.33104	2.37549	0.600829	2020.99
		WT			lag1Δlac1Δ
		1	2	>3	1	2	>3			lag1Δlac1Δ
	1st	90.7692	7.69231	1.53846	23.8938	36.2832	39.823			データの個数	3	3	3	9
	2nd	94.3548	5.64516	0	33.0827	36.8421	30.0752			合計	85.5479	113.304	101.148	300
	3rd	94.3925	4.6729	0.934579	28.5714	40.1786	31.25			平均	28.516	37.768	33.7161	33.3333
	average	93.1722	6.00346	0.824347	28.516	37.768	33.7161			分散	21.1113	4.4364	28.3161	29.5982
	ttest				2.4363e-05	2.99357e-05	0.000449264
					***	***	***			合計
	stdev.p	1.69922	1.25844	0.632892	3.75156	1.71977	4.34481			データの個数	6	6	6
	se (3)	0.981047	0.726558	0.365401	2.16596	0.992909	2.50848			合計	365.065	131.314	103.621
										平均	60.8441	21.8857	17.2702
										分散	1264.3	305.42	336.126
	average	1	2	> 3
	WT	93.1722	6.00346	0.824347
	lag1Δlac1Δ	28.516	37.768	33.7161						分散分析表
										変動要因	変動	自由度	分散	観測された分散比	P-値	F 境界値
	se (3)	1	2	>3						標本	-3.63798e-12	1	-3.63798e-12	-3.56833e-13	#NUM!	4.74723
	WT	0.981047	0.726558	0.365401						列	6875.48	2	3437.74	337.192	2.8555e-11	3.88529
	lag1Δlac1Δ	2.16596	0.992909	2.50848						交互作用	9406.91	2	4703.46	461.341	4.47823e-12	3.88529
										繰り返し誤差	122.342	12	10.1952
										合計	16404.7	17
