# Supplementary material for: Membrane contact sites regulate vacuolar fission via sphingolipid metabolism
Source: eLife. 2024 Mar 27;12:RP89938. doi: 10.7554/eLife.89938 (PMC10972560; doi:10.7554/eLife.89938)
Supplement: Figure 3—source data 5. [file elife-89938-fig3-data5.xlsx]

## Sheet: Figure 3C
	Figure 3C
	＊Number of cells (classified by number of vacuoles per cell)																			＊two-way ANOVA
	WT																			none								PHS
		none						PHS													1	2	≧ 3						1	2	≧ 3
			1	2	≧ 3	total			1	2	≧ 3	total								WT	81.224	15.51	3.265					WT	38.926	23.49	37.584
		1st	199	38	8	245		1st	58	35	56	149									82.803	13.376	3.822						40.517	23.276	36.207
		2nd	130	21	6	157		2nd	47	27	42	116									92.517	6.122	1.361						51.678	25.503	22.819
		3rd	136	9	2	147		3rd	77	38	34	149								lag1∆	79.006	17.127	3.867					lag1∆	30.201	14.094	55.705
																					80.723	18.675	0.602						40.909	25.455	33.636
																					79.167	19.048	1.786						37.903	31.452	30.645
	lag1∆
		none						PHS												分散分析: 繰り返しのある二元配置								分散分析: 繰り返しのある二元配置
			1	2	≧ 3	total			1	2	≧ 3	total
		1st	143	31	7	181		1st	45	21	83	149								概要	1	2	≧ 3	合計				概要	1	2	≧ 3	合計
		2nd	134	31	1	166		2nd	45	28	37	110								WT								WT
		3rd	133	32	3	168		3rd	47	39	38	124								データの個数	3	3	3	9				データの個数	3	3	3	9
																				合計	256.544	35.008	8.448	300				合計	131.121	72.269	96.61	300
																				平均	85.5147	11.6693	2.816	33.3333				平均	43.707	24.0897	32.2033	33.3333
																				分散	37.3978	24.2182	1.66533	1562.14				分散	48.2855	1.50958	66.5233	101.955
	＊Ratio of cells classified into each group (%)
																				lag1∆								lag1∆
	WT																			データの個数	3	3	3	9				データの個数	3	3	3	9
		none			PHS															合計	238.896	54.85	6.255	300.001				合計	109.013	71.001	119.986	300
		1	2	≧ 3	1	2	≧ 3			average	1	2	≧ 3							平均	79.632	18.2833	2.085	33.3334				平均	36.3377	23.667	39.9953	33.3333
	1st	81.2245	15.5102	3.26531	38.9262	23.4899	37.5839		none	WT	85.5147	11.6695	2.81584							分散	0.899191	1.03761	2.73211	1256.11				分散	30.503	77.7227	187.332	128.957
	2nd	82.8025	13.3758	3.82166	40.5172	23.2759	36.2069			lag1∆	79.6317	18.2831	2.08518
	3rd	92.517	6.12245	1.36054	51.6779	25.5034	22.8188		PHS	WT	43.7071	24.0897	32.2032							合計								合計
	average	85.5147	11.6695	2.81584	43.7071	24.0897	32.2032			lag1∆	36.3379	23.6667	39.9954							データの個数	6	6	6					データの個数	6	6	6
	stdev	6.11531	4.92099	1.29065	6.94857	1.22892	8.15624													合計	495.44	89.858	14.703					合計	240.134	143.27	216.596
	stdev.p	4.99313	4.01797	1.05381	5.67349	1.00341	6.65954													平均	82.5733	14.9763	2.4505					平均	40.0223	23.8783	36.0993
	se (3)	2.88278	2.31978	0.60842	3.27559	0.579317	3.84489			se (3)	1	2	≧ 3							分散	25.7005	23.2258	1.91928					分散	47.8075	31.7465	119.757
									none	WT	2.88278	2.31978	0.60842
										lag1∆	0.447096	0.480074	0.779217
	lag1∆								PHS	WT	3.27559	0.579317	3.84489							分散分析表								分散分析表
		none			PHS					lag1∆	2.60349	4.15583	6.45193							変動要因	変動	自由度	分散	観測された分散比	P-値	F 境界値		変動要因	変動	自由度	分散	観測された分散比	P-値	F 境界値
		1	2	≧ 3	1	2	≧ 3													標本	5.55556e-08	1	5.55556e-08	4.90555e-09	0.999945	4.74723		標本	2.27374e-13	1	2.27374e-13	3.31227e-15	1	4.74723
	1st	79.0055	17.1271	3.8674	30.2013	14.094	55.7047													列	22291.8	2	11145.9	984.184	4.95008e-14	3.88529		列	850.743	2	425.372	6.1966	0.0141734	3.88529
	2nd	80.7229	18.6747	0.60241	40.9091	25.4545	33.6364													交互作用	118.328	2	59.1638	5.22416	0.0233337	3.88529		交互作用	172.801	2	86.4007	1.25864	0.318989	3.88529
	3rd	79.1667	19.0476	1.78571	37.9032	31.4516	30.6452													繰り返し誤差	135.9	12	11.325					繰り返し誤差	823.752	12	68.646
	average	79.6317	18.2831	2.08518	36.3379	23.6667	39.9954
	stdev	0.948433	1.01839	1.65297	5.52283	8.81586	13.6866													合計	22546.1	17						合計	1847.3	17
	stdev.p	0.774392	0.831513	1.34964	4.50937	7.19812	11.1751
	se (3)	0.447096	0.480074	0.779217	2.60349	4.15583	6.45193
	ttest	0.174993	0.0848316	0.578756	0.223814	0.938352	0.444647
