# Supplementary material for: Membrane contact sites regulate vacuolar fission via sphingolipid metabolism
Source: eLife. 2024 Mar 27;12:RP89938. doi: 10.7554/eLife.89938 (PMC10972560; doi:10.7554/eLife.89938)
Supplement: Figure 3—source data 6. [file elife-89938-fig3-data6.xlsx]

## Sheet: Figure 3D
	Figure 3D
	＊Number of cells (classified by number of vacuoles per cell)
	none
		WT						lcb3Δ						lcb4Δ5Δ						lcb3Δ4Δ5Δ
			1	2	≧ 3	total			1	2	≧ 3	total			1	2	≧ 3	total			1	2	≧ 3	total
		1st	178	27	2	207		1st	194	6	1	201		1st	133	17	6	156		1st	158	6	3	167
		2nd	115	11	1	127		2nd	112	4	0	116		2nd	120	15	1	136		2nd	113	12	3	128
		3rd	90	13	1	104		3rd	157	3	0	160		3rd	92	13	3	108		3rd	104	15	0	119
	PHS
		WT						lcb3Δ						lcb4Δ5Δ						lcb3Δ4Δ5Δ
			1	2	≧ 3	total			1	2	≧ 3	total			1	2	≧ 3	total			1	2	≧ 3	total
		1st	76	46	21	143		1st	143	16	2	161		1st	48	43	14	105		1st	72	36	32	140
		2nd	69	34	17	120		2nd	143	10	1	154		2nd	75	47	16	138		2nd	107	47	16	170
		3rd	115	66	15	196		3rd	129	6	0	135		3rd	71	44	22	137		3rd	88	33	8	129
	＊Ratio of cells classified into each group (%)
	none
		WT			lcb3Δ			lcb4Δ5Δ			lcb3Δ4Δ5Δ
		1	2	≧ 3	1	2	≧ 3	1	2	≧ 3	1	2	≧ 3
	1st	85.9903	13.0435	0.966184	96.5174	2.98507	0.497512	85.2564	10.8974	3.84615	94.6108	3.59281	1.79641
	2nd	90.5512	8.66142	0.787402	96.5517	3.44828	0	88.2353	11.0294	0.735294	88.2812	9.375	2.34375
	3rd	86.5385	12.5	0.961538	98.125	1.875	0	85.1852	12.037	2.77778	87.395	12.605	0
	average	87.6933	11.4016	0.905041	97.0647	2.76945	0.165837	86.2256	11.3213	2.45308	90.0957	8.52429	1.38005
	stdev.p	2.03316	1.95029	0.0832054	0.749867	0.660136	0.23453	1.42134	0.508966	1.29059	3.21311	3.72808	1.0011
	se (3)	1.17385	1.126	0.0480387	0.432936	0.38113	0.135406	0.820614	0.293852	0.745123	1.85509	2.15241	0.577986
	ttest				0.00361944	0.00405543	0.0136863	0.449831	0.957753	0.165747	0.422086	0.388237	0.540286
					**	**	*	n.s.	n.s.	n.s.	n.s.	n.s.	n.s.
	average	1	2	> 3		se (3)	1	2	> 3
	WT	87.6933	11.4016	0.905041		WT	1.17385	1.126	0.0480387
	lcb3Δ	97.0647	2.76945	0.165837		lcb3Δ	0.432936	0.38113	0.135406
	lcb4Δ5Δ	86.2256	11.3213	2.45308		lcb4Δ5Δ	0.820614	0.293852	0.745123
	lcb3Δ4Δ5Δ	90.0957	8.52429	1.38005		lcb3Δ4Δ5Δ	1.85509	2.15241	0.577986
	PHS
		WT			lcb3Δ			lcb4Δ5Δ			lcb3Δ4Δ5Δ
		1	2	≧ 3	1	2	≧ 3	1	2	≧ 3	1	2	≧ 3
	1st	53.1469	32.1678	14.6853	88.8199	9.93789	1.24224	45.7143	40.9524	13.3333	51.4286	25.7143	22.8571
	2nd	57.5	28.3333	14.1667	92.8571	6.49351	0.649351	54.3478	34.058	11.5942	62.9412	27.6471	9.41176
	3rd	58.6735	33.6735	7.65306	95.5556	4.44444	0	51.8248	32.1168	16.0584	68.2171	25.5814	6.20155
	average	56.4401	31.3915	12.1683	92.4109	6.95861	0.630529	50.629	35.709	13.662	60.8623	26.3142	12.8235
	stdev.p	2.37745	2.24814	3.1998	2.76788	2.26668	0.507315	3.62464	3.79135	1.83725	7.00974	0.944001	7.2149
	se (3)	1.37262	1.29797	1.84741	1.59804	1.30867	0.292899	2.09269	2.18893	1.06074	4.04708	0.545019	4.16552
	ttest				0.000153505	0.000413414	0.00730027	0.130861	0.238218	0.597637	0.445742	0.0421855	0.91221
					***	***	**	n.s.	n.s.	n.s.	n.s.	*	n.s.
	average	1	2	> 3		se (3)	1	2	> 3
	WT	56.4401	31.3915	12.1683		WT	1.37262	1.29797	1.84741
	lcb3Δ	92.4109	6.95861	0.630529		lcb3Δ	1.59804	1.30867	0.292899
	lcb4Δ5Δ	50.629	35.709	13.662		lcb4Δ5Δ	2.09269	2.18893	1.06074
	lcb3Δ4Δ5Δ	60.8623	26.3142	12.8235		lcb3Δ4Δ5Δ	4.04708	0.545019	4.16552
	＊two-way ANOVA
	none																								PHS
		1	2	≧ 3						1	2	≧ 3						1	2	≧ 3						1	2	≧ 3						1	2	≧ 3						1	2	≧ 3
	WT	85.9903	13.0435	0.966184					WT	85.9903	13.0435	0.966184					WT	85.9903	13.0435	0.966184					WT	53.1469	32.1678	14.6853					WT	53.1469	32.1678	14.6853					WT	53.1469	32.1678	14.6853
		90.5512	8.66142	0.787402						90.5512	8.66142	0.787402						90.5512	8.66142	0.787402						57.5	28.3333	14.1667						57.5	28.3333	14.1667						57.5	28.3333	14.1667
		86.5385	12.5	0.961538						86.5385	12.5	0.961538						86.5385	12.5	0.961538						58.6735	33.6735	7.65306						58.6735	33.6735	7.65306						58.6735	33.6735	7.65306
	lcb3Δ	96.5174	2.98507	0.497512					lcb4Δ5Δ	85.2564	10.8974	3.84615					lcb3Δ4Δ5Δ	94.6108	3.59281	1.79641					lcb3Δ	88.8199	9.93789	1.24224					lcb4Δ5Δ	45.7143	40.9524	13.3333					lcb3Δ4Δ5Δ	51.4286	25.7143	22.8571
		96.5517	3.44828	0						88.2353	11.0294	0.735294						88.2812	9.375	2.34375						92.8571	6.49351	0.649351						54.3478	34.058	11.5942						62.9412	27.6471	9.41176
		98.125	1.875	0						85.1852	12.037	2.77778						87.395	12.605	0						95.5556	4.44444	0						51.8248	32.1168	16.0584						68.2171	25.5814	6.20155
	分散分析: 繰り返しのある二元配置								分散分析: 繰り返しのある二元配置								分散分析: 繰り返しのある二元配置								分散分析: 繰り返しのある二元配置								分散分析: 繰り返しのある二元配置								分散分析: 繰り返しのある二元配置
	概要	1	2	≧ 3	合計				概要	1	2	≧ 3	合計				概要	1	2	≧ 3	合計				概要	1	2	≧ 3	合計				概要	1	2	≧ 3	合計				概要	1	2	≧ 3	合計
	WT								WT								WT								WT								WT								WT
	データの個数	3	3	3	9				データの個数	3	3	3	9				データの個数	3	3	3	9				データの個数	3	3	3	9				データの個数	3	3	3	9				データの個数	3	3	3	9
	合計	263.08	34.2049	2.71512	300				合計	263.08	34.2049	2.71512	300				合計	263.08	34.2049	2.71512	300				合計	169.32	94.1746	36.505	300				合計	169.32	94.1746	36.505	300				合計	169.32	94.1746	36.505	300
	平均	87.6933	11.4016	0.905041	33.3333				平均	87.6933	11.4016	0.905041	33.3333				平均	87.6933	11.4016	0.905041	33.3333				平均	56.4401	31.3915	12.1683	33.3333				平均	56.4401	31.3915	12.1683	33.3333				平均	56.4401	31.3915	12.1683	33.3333
	分散	6.20061	5.70542	0.0103847	1685.83				分散	6.20061	5.70542	0.0103847	1685.83				分散	6.20061	5.70542	0.0103847	1685.83				分散	8.4784	7.58123	15.3581	377.473				分散	8.4784	7.58123	15.3581	377.473				分散	8.4784	7.58123	15.3581	377.473
	lcb3Δ								lcb4Δ5Δ								lcb3Δ4Δ5Δ								lcb3Δ								lcb4Δ5Δ								lcb3Δ4Δ5Δ
	データの個数	3	3	3	9				データの個数	3	3	3	9				データの個数	3	3	3	9				データの個数	3	3	3	9				データの個数	3	3	3	9				データの個数	3	3	3	9
	合計	291.194	8.30835	0.497512	300				合計	258.677	33.9639	7.35923	300				合計	270.287	25.5729	4.14016	300				合計	277.233	20.8758	1.89159	300				合計	151.887	107.127	40.9859	300				合計	182.587	78.9427	38.4705	300
	平均	97.0647	2.76945	0.165837	33.3333				平均	86.2256	11.3213	2.45308	33.3333				平均	90.0957	8.52429	1.38005	33.3333				平均	92.4109	6.95861	0.630529	33.3333				平均	50.629	35.709	13.662	33.3333				平均	60.8623	26.3142	12.8235	33.3333
	分散	0.843452	0.65367	0.0825062	2286.37				分散	3.03033	0.38857	2.49844	1589.87				分散	15.4861	20.8478	1.5033	1831.38				分散	11.4917	7.70672	0.386053	1975.62				分散	19.707	21.5615	5.06326	270.988				分散	73.7047	1.33671	78.0821	498.692
	合計								合計								合計								合計								合計								合計
	データの個数	6	6	6					データの個数	6	6	6					データの個数	6	6	6					データの個数	6	6	6					データの個数	6	6	6					データの個数	6	6	6
	合計	554.274	42.5132	3.21264					合計	521.757	68.1688	10.0743					合計	533.367	59.7778	6.85528					合計	446.553	115.05	38.3966					合計	321.207	201.302	77.491					合計	351.907	173.117	74.9755
	平均	92.379	7.08554	0.535439					平均	86.9595	11.3615	1.67906					平均	88.8945	9.96296	1.14255					平均	74.4255	19.1751	6.39944					平均	53.5345	33.5503	12.9152					平均	58.6512	28.8529	12.4959
	分散	29.1645	24.898	0.201083					分散	4.33862	2.43953	1.72245					分散	10.406	13.105	0.673166					分散	396.157	185.206	46.234					分散	21.4049	17.2493	8.83782					分散	38.7399	11.3009	37.5048
	分散分析表								分散分析表								分散分析表								分散分析表								分散分析表								分散分析表
	変動要因	変動	自由度	分散	観測された分散比	P-値	F 境界値		変動要因	変動	自由度	分散	観測された分散比	P-値	F 境界値		変動要因	変動	自由度	分散	観測された分散比	P-値	F 境界値		変動要因	変動	自由度	分散	観測された分散比	P-値	F 境界値		変動要因	変動	自由度	分散	観測された分散比	P-値	F 境界値		変動要因	変動	自由度	分散	観測された分散比	P-値	F 境界値
	標本	0	1	0	0	1	4.74723		標本	-3.63798e-12	1	-3.63798e-12	-1.22396e-12	#NUM!	4.74723		標本	0	1	0	0	1	4.74723		標本	0	1	0	0	1	4.74723		標本	9.09495e-13	1	9.09495e-13	7.01865e-14	1	4.74723		標本	9.09495e-13	1	9.09495e-13	2.95705e-14	1	4.74723
	列	31506.2	2	15753.1	7003.44	3.93375e-19	3.88529		列	26163.1	2	13081.6	4401.17	6.36721e-18	3.88529		列	28016.8	2	14008.4	1689.33	1.96509e-15	3.88529		列	15686.7	2	7843.37	922.709	7.27161e-14	3.88529		列	4950.23	2	2475.11	191.007	7.98033e-10	3.88529		列	6571.6	2	3285.8	106.831	2.26115e-08	3.88529
	交互作用	244.326	2	122.163	54.3105	9.69502e-07	3.88529		交互作用	6.8355	2	3.41775	1.14987	0.349236	3.88529		交互作用	21.414	2	10.707	1.2912	0.310537	3.88529		交互作用	3035.98	2	1517.99	178.579	1.17981e-09	3.88529		交互作用	81.9615	2	40.9807	3.16252	0.0788528	3.88529		交互作用	68.6455	2	34.3227	1.11594	0.359348	3.88529
	繰り返し誤差	26.9921	12	2.24934					繰り返し誤差	35.6675	12	2.97229					繰り返し誤差	99.5073	12	8.29228					繰り返し誤差	102.004	12	8.50037					繰り返し誤差	155.499	12	12.9582					繰り返し誤差	369.082	12	30.7569
	合計	31777.6	17						合計	26205.6	17						合計	28137.7	17						合計	18824.7	17						合計	5187.69	17						合計	7009.32	17
