# Supplementary material for: Membrane contact sites regulate vacuolar fission via sphingolipid metabolism
Source: eLife. 2024 Mar 27;12:RP89938. doi: 10.7554/eLife.89938 (PMC10972560; doi:10.7554/eLife.89938)
Supplement: Figure 3—source data 7. [file elife-89938-fig3-data7.xlsx]

## Sheet: Figure 3F
	Figure 3F
	＊Number of cells (classified by number of vacuoles per cell)										＊two-way ANOVA
	tcb1Δtcb2Δtcb3Δ											1	2	≧ 3
											empty	49.2683	35.3659	15.3659
		RSB1 OE										37.013	32.4675	30.5195
			1	2	≧ 3	total						56.4831	31.6163	11.9005
		1st	202	145	63	410					RSB1 OE	80.4054	12.3874	7.20721
		2nd	57	50	47	154						74.216	19.6864	6.09756
		3rd	318	178	67	563						76.9231	16.6667	6.41026
		empty
			1	2	≧ 3	total					分散分析: 繰り返しのある二元配置
		1st	357	55	32	444
		2nd	426	113	35	574					概要	1	2	≧ 3	合計
		3rd	180	39	15	234					empty
											データの個数	3	3	3	9
											合計	142.764	99.4497	57.7859	300
	＊Ratio of cells classified into each group (%)										平均	47.5881	33.1499	19.262	33.3333
											分散	96.8888	3.86394	98.051	200.165
	tcb1Δtcb2Δtcb3Δ
											RSB1 OE
		empty			RSB1 OE						データの個数	3	3	3	9
		1	2	≧ 3	1	2	≧ 3				合計	231.545	48.7405	19.715	300
	1st	49.2683	35.3659	15.3659	80.4054	12.3874	7.20721				平均	77.1815	16.2468	6.57167	33.3333
	2nd	37.013	32.4675	30.5195	74.216	19.6864	6.09756				分散	9.62719	13.4511	0.327371	1104.9
	3rd	56.4831	31.6163	11.9005	76.9231	16.6667	6.41026
	average	47.5881	33.1499	19.262	77.1815	16.2468	6.57167				合計
	stdev	9.84321	1.96569	9.90207	3.10277	3.66758	0.572163				データの個数	6	6	6
	ttest				0.00767072	0.00215059	0.0910099				合計	374.309	148.19	77.5009
					**	**					平均	62.3848	24.6984	12.9168
	stdev.p	8.03695	1.60498	8.08501	2.5334	2.99457	0.467169				分散	305.337	92.6403	87.6643
	se (3)	4.64013	0.926635	4.66788	1.46266	1.72891	0.26972
											分散分析表
	average	1	2	≧ 3							変動要因	変動	自由度	分散	観測された分散比	P-値	F 境界値
	empty	47.5881	33.1499	19.262							標本	0	1	0	0	1	4.74723
	RSB1 OE	77.1815	16.2468	6.57167							列	8012.31	2	4006.16	108.172	2.10639e-08	3.88529
											交互作用	1983.79	2	991.894	26.7827	3.75873e-05	3.88529
	se (3)	1	2	≧ 3							繰り返し誤差	444.419	12	37.0349
	empty	4.64013	0.926635	4.66788
	RSB1 OE	1.46266	1.72891	0.26972							合計	10440.5	17
