# Supplementary material for: Membrane contact sites regulate vacuolar fission via sphingolipid metabolism
Source: eLife. 2024 Mar 27;12:RP89938. doi: 10.7554/eLife.89938 (PMC10972560; doi:10.7554/eLife.89938)
Supplement: Figure 4—figure supplement 1—source data 1. [file elife-89938-fig4-figsupp1-data1.xlsx]

## Sheet: Figure 4-figure supplement 1
	Figure 4-figure supplement 1
	＊Number of cells (classified by number of vacuoles per cell)								＊Ratio of cells classified into each group (%)
	WT									none										PHS
		none								WT			fab1			vac14				WT			fab1			vac14
			1	2	≧3	total				1	2	≧3	1	2	≧3	1	2	≧3		1	2	≧3	1	2	≧3	1	2	≧3
		1st	115	5	0	120			1st	95.8333	4.16667	0	98.2143	1.78571	0	97.5	2.5	0		62.7119	28.8136	8.47458	97.479	2.52101	0	87.5	11.5385	0.961538
		2nd	103	4	2	109			2nd	94.4954	3.66972	1.83486	100	0	0	97.6923	2.30769	0		59.434	36.7925	3.77358	99.4118	0.588235	0	90.9677	7.74194	1.29032
		3rd	123	4	0	127			3rd	96.8504	3.14961	0	98.3871	1.6129	0	97.4138	2.58621	0		63.9344	31.9672	4.09836	97.6744	2.32558	0	95.7627	2.54237	1.69492
									average	95.7264	3.662	0.611621	98.8671	1.13287	0	97.5354	2.46463	0		62.0268	32.5244	5.44884	98.1884	1.81161	0	91.4102	7.27426	1.31559
		PHS							stdev.p	0.964387	0.415249	0.864962	0.804163	0.804163	0	0.116421	0.116421	0		1.9001	3.28111	2.14362	0.868727	0.868727	0	3.38771	3.6875	0.299933
			1	2	≧3	total			se (3)	0.556789	0.239744	0.499386	0.464283	0.464283	0	0.0672156	0.0672156	0		1.09702	1.89435	1.23762	0.50156	0.50156	0	1.9559	2.12898	0.173166
		1st	74	34	10	118			ttest				0.024072	0.0167901	0.373901	0.0579645	0.0171539	0.373901					1.65297e-05	0.000214917	0.0228645	0.000432519	0.00193696	0.0540649
		2nd	63	39	4	106							*	*	n.s.	n.s.	*	n.s.					***	***	*	***	**	n.s.
		3rd	78	39	5	122
									average						se (3)
											1	2	≧3				1	2	≧3
	fab1								none	WT	95.7264	3.662	0.611621		none	WT	0.556789	0.239744	0.499386
		none								fab1	98.8671	1.13287	0			fab1	0.464283	0.464283	0
			1	2	≧3	total				vac14	97.5354	2.46463	0			vac14	0.0672156	0.0672156	0
		1st	110	2	0	112			PHS	WT	62.0268	32.5244	5.44884		PHS	WT	1.09702	1.89435	1.23762
		2nd	135	0	0	135				fab1	98.1884	1.81161	0			fab1	0.50156	0.50156	0
		3rd	61	1		62				vac14	91.4102	7.27426	1.31559			vac14	1.9559	2.12898	0.173166
		PHS
			1	2	≧3	total
		1st	116	3	0	119
		2nd	169	1	0	170
		3rd	126	3	0	129			＊two-way ANOVA
									none								none								PHS								PHS
									WT	95.8333	4.16667	0					WT	95.8333	4.16667	0					WT	62.7119	28.8136	8.47458					WT	62.7119	28.8136	8.47458
										94.4954	3.66972	1.83486						94.4954	3.66972	1.83486						59.434	36.7925	3.77358						59.434	36.7925	3.77358
	vac14									96.8504	3.14961	0						96.8504	3.14961	0						63.9344	31.9672	4.09836						63.9344	31.9672	4.09836
		none							fab1	98.2143	1.78571	0					vac14	97.5	2.5	0					fab1	97.479	2.52101	0					vac14	87.5	11.5385	0.961538
			1	2	≧3	total				100	0	0						97.6923	2.30769	0						99.4118	0.588235	0						90.9677	7.74194	1.29032
		1st	156	4	0	160				98.3871	1.6129	0						97.4138	2.58621	0						97.6744	2.32558	0						95.7627	2.54237	1.69492
		2nd	127	3		130
		3rd	113	3	0	116
									分散分析: 繰り返しのある二元配置								分散分析: 繰り返しのある二元配置								分散分析: 繰り返しのある二元配置								分散分析: 繰り返しのある二元配置
		PHS
			1	2	≧3	total			概要				合計				概要				合計				概要				合計				概要				合計
		1st	91	12	1	104			WT								WT								WT								WT
		2nd	141	12	2	155			データの個数	3	3	3	9				データの個数	3	3	3	9				データの個数	3	3	3	9				データの個数	3	3	3	9
		3rd	113	3	2	118			合計	287.179	10.986	1.83486	300				合計	287.179	10.986	1.83486	300				合計	186.08	97.5732	16.3465	300				合計	186.08	97.5732	16.3465	300
									平均	95.7264	3.662	0.611621	33.3333				平均	95.7264	3.662	0.611621	33.3333				平均	62.0268	32.5244	5.44884	33.3333				平均	62.0268	32.5244	5.44884	33.3333
									分散	1.39506	0.258648	1.12224	2192.19				分散	1.39506	0.258648	1.12224	2192.19				分散	5.41558	16.1485	6.89268	607.681				分散	5.41558	16.1485	6.89268	607.681
									fab1								vac14								fab1								vac14
									データの個数	3	3	3	9				データの個数	3	3	3	9				データの個数	3	3	3	9				データの個数	3	3	3	9
									合計	296.601	3.39862	0	300				合計	292.606	7.3939	0	300				合計	294.565	5.43483	0	300				合計	274.23	21.8228	3.94678	300
									平均	98.8671	1.13287	0	33.3333				平均	97.5354	2.46463	0	33.3333				平均	98.1884	1.81161	0	33.3333				平均	91.4102	7.27426	1.31559	33.3333
									分散	0.970016	0.970016	0	2416.48				分散	0.0203307	0.0203307	0	2319.72				分散	1.13203	1.13203	0	2367.16				分散	17.2149	20.3964	0.134939	1913.36
									合計								合計								合計								合計
									データの個数	6	6	6					データの個数	6	6	6					データの個数	6	6	6					データの個数	6	6	6
									合計	583.781	14.3846	1.83486					合計	579.785	18.3799	1.83486					合計	480.645	103.008	16.3465					合計	460.311	119.396	20.2933
									平均	97.2968	2.39744	0.30581					平均	96.6309	3.06332	0.30581					平均	80.1076	17.168	2.72442					平均	76.7185	19.8993	3.38222
									分散	3.90532	2.41041	0.56112					分散	1.54789	0.541697	0.56112					分散	394.918	289.895	11.664					分散	268.067	205.889	7.93617
									分散分析表								分散分析表								分散分析表								分散分析表
									変動要因	変動	自由度	分散	観測された分散比	P-値	F 境界値		変動要因	変動	自由度	分散	観測された分散比	P-値	F 境界値		変動要因	変動	自由度	分散	観測された分散比	P-値	F 境界値		変動要因	変動	自由度	分散	観測された分散比	P-値	F 境界値
									標本	-7.27596e-12	1	-7.27596e-12	-9.25698e-12	#NUM!	4.74723		標本	0	1	0	0	1	4.74723		標本	0	1	0	0	1	4.74723		標本	-3.63798e-12	1	-3.63798e-12	-3.29711e-13	#NUM!	4.74723
									列	36835	2	18417.5	23432	2.81438e-22	3.88529		列	36082	2	18041	38431.3	1.44674e-23	3.88529		列	20316.3	2	10158.2	1983.96	7.51348e-16	3.88529		列	17758.9	2	8879.43	804.745	1.64287e-13	3.88529
									交互作用	24.9523	2	12.4761	15.873	0.000426045	3.88529		交互作用	7.6203	2	3.81015	8.11645	0.00589595	3.88529		交互作用	3420.95	2	1710.47	334.067	3.0166e-11	3.88529		交互作用	2277.06	2	1138.53	103.185	2.75377e-08	3.88529
									繰り返し誤差	9.43197	12	0.785997					繰り返し誤差	5.63322	12	0.469435					繰り返し誤差	61.4417	12	5.12014					繰り返し誤差	132.406	12	11.0338
									合計	36869.4	17						合計	36095.3	17						合計	23798.7	17						合計	20168.3	17
