# Supplementary material for: Membrane contact sites regulate vacuolar fission via sphingolipid metabolism
Source: eLife. 2024 Mar 27;12:RP89938. doi: 10.7554/eLife.89938 (PMC10972560; doi:10.7554/eLife.89938)
Supplement: Figure 4—source data 1. [file elife-89938-fig4-data1.xlsx]

## Sheet: Figure 4A
	Figure 4A
	＊Number of cells (classified by number of vacuoles per cell)																	＊two-way ANOVA
	sec18, 25C																	none								PHS
		none						PHS											1	2	≧ 3						1	2	≧ 3
			1	2	≧ 3	total			1	2	≧ 3	total						25C	63.4615	17.6282	18.9103					25C	20.9945	17.6796	61.326
		1st	198	55	59	312		1st	38	32	111	181							65.0862	19.3966	15.5172						24.498	27.3092	48.1928
		2nd	151	45	36	232		2nd	61	68	120	249							68.6486	17.2973	14.0541						14.375	11.875	73.75
		3rd	127	32	26	185		3rd	23	19	118	160						30C	54.0404	17.1717	28.7879					30C	9.09091	4.95868	85.9504
																			52.8796	17.801	29.3194						17.0984	19.6891	63.2124
																			51.7073	17.0732	31.2195						16.9231	13.8462	69.2308
	sec18, 30C
		none						PHS										分散分析: 繰り返しのある二元配置								分散分析: 繰り返しのある二元配置
			1	2	≧ 3	total			1	2	≧ 3	total
		1st	107	34	57	198		1st	11	6	104	121						概要	1	2	≧ 3	合計				概要	1	2	≧ 3	合計
		2nd	101	34	56	191		2nd	33	38	122	193						25C								25C
		3rd	106	35	64	205		3rd	33	27	135	195						データの個数	3	3	3	9				データの個数	3	3	3	9
																		合計	197.196	54.3221	48.4816	300				合計	59.8675	56.8638	183.269	300
																		平均	65.7321	18.1074	16.1605	33.3333				平均	19.9558	18.9546	61.0896	33.3333
	＊Ratio of cells classified into each group (%)																	分散	7.03944	1.2739	6.20603	594.787				分散	26.4278	60.7732	163.335	496.177
	sec18, 25C																	30C								30C
		none			PHS													データの個数	3	3	3	9				データの個数	3	3	3	9
		1	2	≧ 3	1	2	≧ 3		average		1	2	> 3					合計	158.627	52.0459	89.3268	300				合計	43.1124	38.494	218.394	300
	1st	63.4615	17.6282	18.9103	20.9945	17.6796	61.326		none	25 ℃	65.7321	18.1074	16.1605					平均	52.8758	17.3486	29.7756	33.3333				平均	14.3708	12.8313	72.7979	33.3333
	2nd	65.0862	19.3966	15.5172	24.498	27.3092	48.1928			30 ℃	52.8758	17.3486	29.7756					分散	1.36083	0.155929	1.63431	244.566				分散	20.9157	55.0189	138.797	930.193
	3rd	68.6486	17.2973	14.0541	14.375	11.875	73.75		PHS	25 ℃	19.9558	18.9546	61.0896
	average	65.7321	18.1074	16.1605	19.9558	18.9546	61.0896			30 ℃	14.3708	12.8313	72.7979					合計								合計
	stdev	2.65319	1.12867	2.49119	5.1408	7.79572	12.7803											データの個数	6	6	6					データの個数	6	6	6
	stdev.p	2.16632	0.921558	2.03405	4.19745	6.36518	10.435		se (2)		1	2	> 3					合計	355.824	106.368	137.808					合計	102.98	95.3577	401.662
	se (3)	1.25073	0.532062	1.17436	2.4234	3.67494	6.02467		none	25 ℃	1.25073	0.532062	1.17436					平均	59.3039	17.728	22.9681					平均	17.1633	15.893	66.9437
										30 ℃	0.549916	0.186147	0.602644					分散	52.9459	0.744623	58.7472					分散	28.2951	57.5652	161.978
									PHS	25 ℃	2.4234	3.67494	6.02467
	sec18, 25C									30 ℃	2.15591	3.49663	5.55372
		none			PHS													分散分析表								分散分析表
		1	2	≧ 3	1	2	≧ 3											変動要因	変動	自由度	分散	観測された分散比	P-値	F 境界値		変動要因	変動	自由度	分散	観測された分散比	P-値	F 境界値
	1st	54.0404	17.1717	28.7879	9.09091	4.95868	85.9504											標本	-9.09495e-13	1	-9.09495e-13	-3.08819e-13	#NUM!	4.74723		標本	-1.81899e-12	1	-1.81899e-12	-2.34573e-14	#NUM!	4.74723
	2nd	52.8796	17.801	29.3194	17.0984	19.6891	63.2124											列	6152.63	2	3076.32	1044.56	3.47037e-14	3.88529		列	10171.8	2	5085.88	65.5866	3.46672e-07	3.88529
	3rd	51.7073	17.0732	31.2195	16.9231	13.8462	69.2308											交互作用	526.848	2	263.424	89.4456	6.17124e-08	3.88529		交互作用	308.657	2	154.328	1.99019	0.179294	3.88529
	average	52.8758	17.3486	29.7756	14.3708	12.8313	72.7979											繰り返し誤差	35.3409	12	2.94507					繰り返し誤差	930.535	12	77.5446
	stdev	1.16655	0.394878	1.2784	4.57337	7.41747	11.7812
	stdev.p	0.952483	0.322417	1.04381	3.73414	6.05634	9.61932											合計	6714.82	17						合計	11411	17
	se (3)	0.549916	0.186147	0.602644	2.15591	3.49663	5.55372
	ttest	0.00154348	0.333477	0.00108829	0.232474	0.380123	0.308148
		**	n.s.	**	n.s.	n.s.	n.s.
