# Supplementary material for: Membrane contact sites regulate vacuolar fission via sphingolipid metabolism
Source: eLife. 2024 Mar 27;12:RP89938. doi: 10.7554/eLife.89938 (PMC10972560; doi:10.7554/eLife.89938)
Supplement: Figure 4—source data 2. [file elife-89938-fig4-data2.xlsx]

## Sheet: Figure 4B
	Figure 4B
	＊Number of cells (classified by number of vacuoles per cell)																	＊two-way ANOVA
	WT																	none								PHS
		none						PHS											1	2	≧ 3						1	2	≧ 3
			1	2	≧ 3	total			1	2	≧ 3	total						WT	43.659	34.9272	21.4137					WT	3.1746	9.12698	87.6984
		1st	210	168	103	481		1st	8	23	221	252							46.6899	33.7979	19.5122						7.27273	13.3333	79.3939
		2nd	134	97	56	287		2nd	12	22	131	165							87.3737	10.6061	2.0202						5.83333	3.75	90.4167
		3rd	173	21	4	198		3rd	14	9	217	240						nvjΔ	54.9317	30.8042	14.264					nvjΔ	25.4839	11.6129	62.9032
																			82.3529	10.4575	7.18954						16.4021	10.0529	73.545
																			94.8193	3.9759	1.20482						24.0964	12.6506	63.253
	nvjΔ
		none						PHS										分散分析: 繰り返しのある二元配置								分散分析: 繰り返しのある二元配置
			1	2	≧ 3	total			1	2	≧ 3	total
		1st	362	203	94	659		1st	79	36	195	310						概要	1	2	≧ 3	合計				概要	1	2	≧ 3	合計
		2nd	126	16	11	153		2nd	31	19	139	189						WT								WT
		3rd	787	33	10	830		3rd	40	21	105	166						データの個数	3	3	3	9				データの個数	3	3	3	9
																		合計	177.723	79.3312	42.9461	300				合計	16.2807	26.2103	257.509	300
																		平均	59.2409	26.4437	14.3154	33.3333				平均	5.42689	8.73677	85.8363	33.3333
	＊Ratio of cells classified into each group (%)																	分散	595.889	188.443	114.282	629.785				分散	4.32255	23.0743	32.9756	1567.72
	WT																	nvjΔ								nvjΔ
		none			PHS													データの個数	3	3	3	9				データの個数	3	3	3	9
		1	2	≧ 3	1	2	≧ 3		average		1	2	≧ 3					合計	232.104	45.2377	22.6584	300				合計	65.9824	34.3164	199.701	300
	1st	43.659	34.9272	21.4137	3.1746	9.12698	87.6984		none	WT	59.2409	26.4437	14.3154					平均	77.368	15.0792	7.5528	33.3333				平均	21.9941	11.4388	66.5671	33.3333
	2nd	46.6899	33.7979	19.5122	7.27273	13.3333	79.3939			nvjΔ	77.368	15.0792	7.5528					分散	416.392	195.96	42.7348	1265.11				分散	23.9342	1.70973	36.5489	657.709
	3rd	87.3737	10.6061	2.0202	5.83333	3.75	90.4167		PHS	WT	5.42689	8.73677	85.8363
	average	59.2409	26.4437	14.3154	5.42689	8.73677	85.8363			nvjΔ	21.9941	11.4388	66.5671					合計								合計
	stdev	24.4108	13.7274	10.6903	2.07908	4.80357	5.74244											データの個数	6	6	6					データの個数	6	6	6
	stdev.p	19.9314	11.2084	8.72859	1.69756	3.9221	4.68868		se (2)		1	2	≧ 3					合計	409.827	124.569	65.6045					合計	82.263	60.5267	457.21
	se (3)	11.5074	6.47118	5.03945	0.980085	2.26442	2.70701		none	WT	11.5074	6.47118	5.03945					平均	68.3044	20.7615	10.9341					平均	13.7105	10.0878	76.2017
										nvjΔ	9.61933	6.59899	3.08166					分散	503.49	192.507	76.5266					分散	93.6447	12.1039	139.201
									PHS	WT	0.980085	2.26442	2.70701
	nvjΔ									nvjΔ	2.30623	0.616393	2.84991
		none			PHS													分散分析表								分散分析表
		1	2	≧ 3	1	2	≧ 3											変動要因	変動	自由度	分散	観測された分散比	P-値	F 境界値		変動要因	変動	自由度	分散	観測された分散比	P-値	F 境界値
	1st	54.9317	30.8042	14.264	25.4839	11.6129	62.9032											標本	0	1	0	0	1	4.74723		標本	-3.63798e-12	1	-3.63798e-12	-1.78092e-13	#NUM!	4.74723
	2nd	82.3529	10.4575	7.18954	16.4021	10.0529	73.545											列	11296.5	2	5648.27	21.8122	0.000100809	3.88529		列	16578.6	2	8289.32	405.791	9.5685e-12	3.88529
	3rd	94.8193	3.9759	1.20482	24.0964	12.6506	63.253											交互作用	755.214	2	377.607	1.45822	0.271079	3.88529		交互作用	979.619	2	489.809	23.9779	6.42839e-05	3.88529
	average	77.368	15.0792	7.5528	21.9941	11.4388	66.5671											繰り返し誤差	3107.4	12	258.95					繰り返し誤差	245.131	12	20.4276
	stdev	20.4057	13.9986	6.53718	4.89226	1.30757	6.04557
	stdev.p	16.6612	11.4298	5.33759	3.99451	1.06762	4.93619											合計	15159.2	17						合計	17803.4	17
	se (3)	9.61933	6.59899	3.08166	2.30623	0.616393	2.84991
	ttest	0.379597	0.372203	0.402832	0.005699	0.400402	0.0160935
		n.s.	n.s.	n.s.	**	n.s.	*
