# Supplementary material for: Membrane contact sites regulate vacuolar fission via sphingolipid metabolism
Source: eLife. 2024 Mar 27;12:RP89938. doi: 10.7554/eLife.89938 (PMC10972560; doi:10.7554/eLife.89938)
Supplement: Figure 4—source data 3. [file elife-89938-fig4-data3.xlsx]

## Sheet: Figure 4C
	Figure 4C
	＊Number of cells (classified by number of vacuoles per cell)																						＊two-way ANOVA
	#1						#2						#3											1	2	≧ 3						1	2	≧ 3						1	2	≧ 3
		1	2	≧ 3	total			1	2	≧ 3	total			1	2	≧ 3	total						WT	73.4513	25.6637	0.884956					tcb3∆	49.505	33.6634	16.8317					tcb3∆	49.505	33.6634	16.8317
	WT	83	29	1	113		WT	93	5	2	100		WT	120	7	1	128							93	5	2						60.396	34.6535	4.9505						60.396	34.6535	4.9505
	nvj1∆	101	5	0	106		nvj1∆	116	8	2	126		nvj1∆	113	1	0	114							93.75	5.46875	0.78125						65.7718	30.8725	3.3557						65.7718	30.8725	3.3557
	tcb3∆	50	34	17	101		tcb3∆	61	35	5	101		tcb3∆	98	46	5	149						nvj1∆	95.283	4.71698	0					tcb3∆ nvj1∆	72.8477	24.5033	2.64901					tcb3∆nvj1∆2∆3∆mdm1∆	96.4539	3.5461	0
	tcb3∆ nvj1∆	110	37	4	151		tcb3∆ nvj1∆	116	6	0	122		tcb3∆ nvj1∆	88	10	2	100							92.0635	6.34921	1.5873						95.082	4.91803	0						98.4962	1.50376	0
	tcb3∆nvj1∆2∆3∆mdm1∆	136	5	0	141		tcb3∆nvj1∆2∆3∆mdm1∆	131	2	0	133		tcb3∆nvj1∆2∆3∆mdm1∆	166	1	0	167							99.1228	0.877193	0						88	10	2						99.4012	0.598802	0
																							分散分析: 繰り返しのある二元配置								分散分析: 繰り返しのある二元配置								分散分析: 繰り返しのある二元配置
	＊Ratio of cells classified into each group (%)
																							概要	1	2	≧ 3	合計				概要	1	2	≧ 3	合計				概要	1	2	≧ 3	合計
		WT			nvj1∆			tcb3∆			tcb3∆ nvj1∆			tcb3∆nvj1∆2∆3∆mdm1∆									WT								tcb3∆								tcb3∆
		1	2	≧ 3	1	2	≧ 3	1	2	≧ 3	1	2	≧ 3	1	2	≧ 3							データの個数	3	3	3	9				データの個数	3	3	3	9				データの個数	3	3	3	9
	#1	73.4513	25.6637	0.884956	95.283	4.71698	0	49.505	33.6634	16.8317	72.8477	24.5033	2.64901	96.4539	3.5461	0							合計	260.201	36.1325	3.66621	300				合計	175.673	99.1893	25.1379	300				合計	175.673	99.1893	25.1379	300
	#2	93	5	2	92.0635	6.34921	1.5873	60.396	34.6535	4.9505	95.082	4.91803	0	98.4962	1.50376	0							平均	86.7338	12.0442	1.22207	33.3333				平均	58.5576	33.0631	8.37929	33.3333				平均	58.5576	33.0631	8.37929	33.3333
	#3	93.75	5.46875	0.78125	99.1228	0.877193	0	65.7718	30.8725	3.3557	88	10	2	99.4012	0.598802	0							分散	132.458	139.174	0.456572	1694.01				分散	68.6876	3.84419	54.218	503.828				分散	68.6876	3.84419	54.218	503.828
	average	86.7338	12.0442	1.22207	95.4898	3.98113	0.529101	58.5576	33.0631	8.37929	85.3099	13.1404	1.54967	98.1171	1.88289	0
	stdev.p	9.3971	9.63239	0.551707	2.88566	2.29374	0.748261	6.76696	1.60087	6.0121	9.27428	8.2983	1.12736	1.23273	1.23273	0							nvj1∆								tcb3∆ nvj1∆								tcb3∆nvj1∆2∆3∆mdm1∆
	se (3)	5.42542	5.56126	0.318528	1.66604	1.32429	0.432009	3.90691	0.924264	3.47109	5.35451	4.79102	0.650881	0.711718	0.711718	0							データの個数	3	3	3	9				データの個数	3	3	3	9				データの個数	3	3	3	9
	ttest	-	-	-	0.276275	0.313634	0.351278	0.0262692	0.038244	0.16894	0.886162	0.908824	0.730743	0.164629	0.213026	0.0350979							合計	286.469	11.9434	1.5873	300				合計	255.93	39.4213	4.64901	300				合計	294.351	5.64866	0	300
		-	-	-	n.s.	n.s.	n.s.	*	*	n.s.	n.s.	n.s.	n.s.	n.s.	n.s.	*							平均	95.4898	3.98113	0.529101	33.3333				平均	85.3099	13.1404	1.54967	33.3333				平均	98.1171	1.88289	0	33.3333
								-	-	-	0.0300621	0.0290029	0.189481	0.00124301	2.60829e-05	0.120026							分散	12.4905	7.89184	0.839842	2180.72				分散	129.018	103.293	1.90641	1603.37				分散	2.27944	2.27944	0	2362.58
								-	-	-	*	*	n.s.	**	***	n.s.
																							合計								合計								合計
																							データの個数	6	6	6					データの個数	6	6	6					データの個数	6	6	6
	average	1	2	≧ 3		se (3)	1	2	≧ 3														合計	546.671	48.0758	5.25351					合計	431.602	138.611	29.7869					合計	470.024	104.838	25.1379
	WT	86.7338	12.0442	1.22207		WT	5.42542	5.56126	0.318528														平均	91.1118	8.01264	0.875585					平均	71.9337	23.1018	4.96448					平均	78.3374	17.473	4.18965
	nvj1∆	95.4898	3.98113	0.529101		nvj1∆	1.66604	1.32429	0.432009														分散	80.9797	78.3302	0.662627					分散	293.788	161.928	36.4429					分散	497.873	294.111	42.751
	tcb3∆	58.5576	33.0631	8.37929		tcb3∆	3.90691	0.924264	3.47109
	tcb3∆ nvj1∆	85.3099	13.1404	1.54967		tcb3∆ nvj1∆	5.35451	4.79102	0.650881
	tcb3∆nvj1∆2∆3∆mdm1∆	98.1171	1.88289	0		tcb3∆ nvj2∆	0.711718	0.711718	0														分散分析表								分散分析表								分散分析表
																							変動要因	変動	自由度	分散	観測された分散比	P-値	F 境界値		変動要因	変動	自由度	分散	観測された分散比	P-値	F 境界値		変動要因	変動	自由度	分散	観測された分散比	P-値	F 境界値
																							標本	0	1	0	0	1	4.74723		標本	-3.63798e-12	1	-3.63798e-12	-6.04705e-14	#NUM!	4.74723		標本	0	1	0	0	1	4.74723
																							列	30197.9	2	15099	308.866	4.788e-11	3.88529		列	14396.8	2	7198.4	119.652	1.18547e-08	3.88529		列	18757.6	2	9378.8	428.554	6.92863e-12	3.88529
																							交互作用	213.24	2	106.62	2.18103	0.155618	3.88529		交互作用	1738.86	2	869.43	14.4517	0.000637578	3.88529		交互作用	3911.06	2	1955.53	89.3557	6.20622e-08	3.88529
																							繰り返し誤差	586.623	12	48.8852					繰り返し誤差	721.934	12	60.1612					繰り返し誤差	262.617	12	21.8848
																							合計	30997.8	17						合計	16857.6	17						合計	22931.3	17
