# Supplementary material for: Membrane contact sites regulate vacuolar fission via sphingolipid metabolism
Source: eLife. 2024 Mar 27;12:RP89938. doi: 10.7554/eLife.89938 (PMC10972560; doi:10.7554/eLife.89938)
Supplement: Figure 5—source data 1. [file elife-89938-fig5-data1.xlsx]

## Sheet: Figure 5A
	Figure 5A
	＊Number of cells (classified by number of vacuoles per cell)								＊Ratio of cells classified into each group (%)
	WT	none								none							PHS							NaCl
			1	2	≧3	total				WT			nvj1∆2∆3∆				WT			nvj1∆2∆3∆				WT			nvj1∆2∆3∆
		1st	93	11	5	109				1	2	≧3	1	2	≧3		1	2	≧3	1	2	≧3		1	2	≧3	1	2	≧3
		2nd	123	12	1	136			1st	85.3211	10.0917	4.58716	97.541	2.45902	0		54.4828	35.8621	9.65517	87.2727	9.09091	3.63636		48.538	38.0117	13.4503	83.6879	14.8936	1.41844
		3rd	126	8	2	136			2nd	90.4412	8.82353	0.735294	95.0704	4.92958	0		51.5625	35.1562	13.2812	91.9355	6.45161	1.6129		53.0769	30	16.9231	81.5126	15.1261	3.36134
									3rd	92.6471	5.88235	1.47059	96.8889	3.11111	0		63.0769	26.9231	10	84.3137	14.3791	1.30719		48.2014	35.9712	15.8273	86.9565	11.3043	1.73913
									average	89.4698	8.26588	2.26435	96.5001	3.4999	0		56.3741	32.6471	10.9788	87.8406	9.97387	2.18549		49.9388	34.661	15.4002	84.0524	13.7747	2.17297
		PHS							stdev.p	3.06867	1.76314	1.66968	1.0454	1.0454	0		4.88728	4.05776	1.63415	3.13738	3.29605	1.03349		2.22324	3.39945	1.44957	2.23736	1.74936	0.850444
			1	2	≧3	total			se (3)	1.7717	1.01795	0.96399	0.603561	0.603561	0		2.82167	2.34275	0.943476	1.81137	1.90298	0.596685		1.28359	1.96267	0.836908	1.29174	1.00999	0.491004
		1st	79	52	14	145			ttest				0.0374066	0.0302654	0.127581					0.00155926	0.00358099	0.00300567					0.000106569	0.00151119	0.000370748
		2nd	66	45	17	128							*	*	n.s.					**	**	**					***	**	***
		3rd	82	35	13	130
									average						se (3)
		NaCl									1	2	≧3			1	2	≧3
			1	2	≧3	total			none	WT	89.4698	8.26588	2.26435		WT	1.7717	1.01795	0.96399
		1st	83	65	23	171				nvj1∆2∆3∆	96.5001	3.4999	0		nvj1∆2∆3∆	0.603561	0.603561	0
		2nd	69	39	22	130			PHS	WT	56.3741	32.6471	10.9788		WT	2.82167	2.34275	0.943476
		3rd	67	50	22	139				nvj1∆2∆3∆	87.8406	9.97387	2.18549		nvj1∆2∆3∆	1.81137	1.90298	0.596685
									NaCl	WT	49.9388	34.661	15.4002		WT	1.28359	1.96267	0.836908
										nvj1∆2∆3∆	84.0524	13.7747	2.17297		nvj1∆2∆3∆	1.29174	1.00999	0.491004
	nvj1Δ2Δ3Δ
		none
			1	2	≧3	total			＊two-way ANOVA
		1st	119	3	0	122
		2nd	135	7	0	142			none								PHS								NaCl
		3rd	218	7	0	225			WT	85.3211	10.0917	4.58716					WT	54.4828	35.8621	9.65517					WT	48.538	38.0117	13.4503
										90.4412	8.82353	0.735294						51.5625	35.1562	13.2812						53.0769	30	16.9231
										92.6471	5.88235	1.47059						63.0769	26.9231	10						48.2014	35.9712	15.8273
		PHS							nvj1∆2∆3∆	97.541	2.45902	0					nvj1∆2∆3∆	87.2727	9.09091	3.63636					nvj1∆2∆3∆	83.6879	14.8936	1.41844
			1	2	≧3	total				95.0704	4.92958	0						91.9355	6.45161	1.6129						81.5126	15.1261	3.36134
		1st	96	10	4	110				96.8889	3.11111	0						84.3137	14.3791	1.30719						86.9565	11.3043	1.73913
		2nd	114	8	2	124
		3rd	129	22	2	153
									分散分析: 繰り返しのある二元配置								分散分析: 繰り返しのある二元配置								分散分析: 繰り返しのある二元配置
		NaCl							概要				合計				概要				合計				概要				合計
			1	2	≧3	total			WT								WT								WT
		1st	118	21	2	141			データの個数	3	3	3	9				データの個数	3	3	3	9				データの個数	3	3	3	9
		2nd	97	18	4	119			合計	268.409	24.7976	6.79304	300				合計	169.122	97.9414	32.9364	300				合計	149.816	103.983	46.2007	300
		3rd	100	13	2	115			平均	89.4698	8.26588	2.26435	33.3333				平均	56.3741	32.6471	10.9788	33.3333				平均	49.9388	34.661	15.4002	33.3333
									分散	14.1251	4.66298	4.18175	1785.1				分散	35.8283	24.6981	4.00566	402.785				分散	7.41422	17.3344	3.15187	231.638
									nvj1∆2∆3∆								nvj1∆2∆3∆								nvj1∆2∆3∆
									データの個数	3	3	3	9				データの個数	3	3	3	9				データの個数	3	3	3	9
									合計	289.5	10.4997	0	300				合計	263.522	29.9216	6.55646	300				合計	252.157	41.324	6.51891	300
									平均	96.5001	3.4999	0	33.3333				平均	87.8406	9.97387	2.18549	33.3333				平均	84.0524	13.7747	2.17297	33.3333
									分散	1.63929	1.63929	0	2247.51				分散	14.7647	16.2959	1.60215	1690.75				分散	7.50866	4.59038	1.08488	1475.52
									合計								合計								合計
									データの個数	6	6	6					データの個数	6	6	6					データの個数	6	6	6
									合計	557.91	35.2973	6.79304					合計	432.644	127.863	39.4929					合計	401.973	145.307	52.7196
									平均	92.9849	5.88289	1.13217					平均	72.1074	21.3105	6.58215					平均	66.9956	24.2178	8.7866
									分散	21.1334	9.33526	3.21088					分散	317.281	170.621	25.4399					分散	355.09	139.641	54.1829
									分散分析表								分散分析表								分散分析表
									変動要因	変動	自由度	分散	観測された分散比	P-値	F 境界値		変動要因	変動	自由度	分散	観測された分散比	P-値	F 境界値		変動要因	変動	自由度	分散	観測された分散比	P-値	F 境界値
									標本	-7.27596e-12	1	-7.27596e-12	-1.66318e-12	#NUM!	4.74723		標本	0	1	0	0	1	4.74723		標本	0	1	0	0	1	4.74723
									列	32092.5	2	16046.3	3667.94	1.89721e-17	3.88529		列	14181.6	2	7090.8	437.727	6.11242e-12	3.88529		列	10912.7	2	5456.34	796.849	1.74223e-13	3.88529
									交互作用	115.901	2	57.9504	13.2466	0.000917876	3.88529		交互作用	2372.32	2	1186.16	73.2236	1.88704e-07	3.88529		交互作用	2662.4	2	1331.2	194.41	7.20106e-10	3.88529
									繰り返し誤差	52.4968	12	4.37474					繰り返し誤差	194.39	12	16.1991					繰り返し誤差	82.1688	12	6.8474
									合計	32260.9	17						合計	16748.3	17						合計	13657.3	17
