# Supplementary material for: Membrane contact sites regulate vacuolar fission via sphingolipid metabolism
Source: eLife. 2024 Mar 27;12:RP89938. doi: 10.7554/eLife.89938 (PMC10972560; doi:10.7554/eLife.89938)
Supplement: Figure 5—source data 4. [file elife-89938-fig5-data4.xlsx]

## Sheet: Figure 5B
	Figure 5B
	0.2 M													0.8 M
	＊Original Signal Intensity													＊Original Signal Intensity
	1st		Ceramide	DHS	PE	PHS	PC	PI	IPC,MIPC	PHS-1P,DHS-1P				1st		Ceramide	DHS	PE	PHS	PC	PI	IPC,MIPC	PHS-1P,DHS-1P
		0M	19682.7	89321.2	3871.13	7724.78	787.54	7787.94	31064.6	2088.56					0M	40638.5	64138.3	7524.51	17818	4117.07	11653	70330.8	11573.1
		0.2M	18281.1	86358	4206.22	9219.19	881.27	8427.63	29366.5	2582.3					0.8M	33004.3	70755.9	11287.8	24187.9	5697.23	20367.1	15019.8	5100.52
	2nd		Ceramide	DHS	PE	PHS	PC	PI	IPC,MIPC	PHS-1P,DHS-1P				2nd		Ceramide	DHS	PE	PHS	PC	PI	IPC,MIPC	PHS-1P,DHS-1P
		0M	15838.1	77157.8	3525.77	8113.64	925.24	7613	30982.1	2754.43					0M	20867.9	77093.1	3383.34	9563.02	1231.12	2749.27	17376.8	3823.91
		0.2M	16014.1	66702.8	3741.56	9477.19	814.89	9700.52	29221	3423.58					0.8M	13538.8	55946.8	3605.71	12470.8	1192.33	3314.66	11640.5	1759.06
	3rd		Ceramide	DHS	PE	PHS	PC	PI	IPC,MIPC	PHS-1P,DHS-1P				3rd		Ceramide	DHS	PE	PHS	PC	PI	IPC,MIPC	PHS-1P,DHS-1P
		0M	37815.3	66886.4	8769.6	15445.5	4171.1	10853.5	55108.4	15049.5					0M	5589.96	19368.3	3844.72	3152.37	973.64	2468.04	8484.12	1977.92
		0.2M	37533.5	70656.5	8950.34	16174.8	4747.28	11631.5	49107.9	13941.4					0.8M	4177.81	19697.6	4832.42	4193.1	770.13	2721.37	3702.87	401.26
	＊Relative amount (% to 0M)													＊Relative amount (% to 0M)
	1st		Ceramide	DHS	PE	PHS	PC	PI	IPC,MIPC	PHS-1P,DHS-1P				1st		Ceramide	DHS	PE	PHS	PC	PI	IPC,MIPC	PHS-1P,DHS-1P
		0M	100	100	100	100	100	100	100	100					0M	100	100	100	100	100	100	100	100
		0.2M	92.8791	96.6825	108.656	119.346	111.902	108.214	94.5337	123.64					0.8M	81.2142	110.318	150.014	135.75	138.381	174.78	21.356	44.0722
	2nd													2nd
		0M	100	100	100	100	100	100	100	100					0M	100	100	100	100	100	100	100	100
		0.2M	101.111	86.4499	106.12	116.806	88.0734	127.42	94.3156	124.294					0.8M	64.8785	72.5704	106.572	130.407	96.8492	120.565	66.989	46.0016
	3rd													3rd
		0M	100	100	100	100	100	100	100	100					0M	100	100	100	100	100	100	100	100
		0.2M	99.255	105.637	102.061	104.722	113.814	107.169	89.1115	92.6372					0.8M	74.7377	101.7	125.69	133.014	79.098	110.264	43.6447	20.287
		average	Ceramide	DHS	PE	PHS	PC	PI	IPC,MIPC	PHS-1P,DHS-1P					average	Ceramide	DHS	PE	PHS	PC	PI	IPC,MIPC	PHS-1P,DHS-1P
		0M	100	100	100	100	100	100	100	100					0M	100	100	100	100	100	100	100	100
		0.2M	97.7484	96.2563	105.612	113.624	104.596	114.268	92.6536	113.524					0.8M	73.6102	94.8628	127.425	133.057	104.776	135.203	43.9966	36.7869
		se(4)	Ceramide	DHS	PE	PHS	PC	PI	IPC,MIPC	PHS-1P,DHS-1P					se(4)	Ceramide	DHS	PE	PHS	PC	PI	IPC,MIPC	PHS-1P,DHS-1P
		0M	0	0	0	0	0	0	0	0					0M	0	0	0	0	0	0	0	0
		0.2M	2.03546	4.52569	1.56826	3.6835	6.76046	5.37527	1.44697	8.52825					0.8M	3.87778	9.32471	10.2637	1.25953	14.3429	16.3387	10.7568	6.75141
			Ceramide	DHS	PE	PHS	PC	PI	IPC,MIPC	PHS-1P,DHS-1P						Ceramide	DHS	PE	PHS	PC	PI	IPC,MIPC	PHS-1P,DHS-1P
	0M	1st	100	100	100	100	100	100	100	100				0M	1st	100	100	100	100	100	100	100	100
		2nd	100	100	100	100	100	100	100	100					2nd	100	100	100	100	100	100	100	100
		3rd	100	100	100	100	100	100	100	100					3rd	100	100	100	100	100	100	100	100
	0.2M	1st	92.8791	96.6825	108.656	119.346	111.902	108.214	94.5337	123.64				0.8M	1st	81.2142	110.318	150.014	135.75	138.381	174.78	21.356	44.0722
		2nd	101.111	86.4499	106.12	116.806	88.0734	127.42	94.3156	124.294					2nd	64.8785	72.5704	106.572	130.407	96.8492	120.565	66.989	46.0016
		3rd	99.255	105.637	102.061	104.722	113.814	107.169	89.1115	92.6372					3rd	74.7377	101.7	125.69	133.014	79.098	110.264	43.6447	20.287
		ttest	0.417494	0.536444	0.0431535	0.0391632	0.608399	0.0961071	0.0143134	0.265085					ttest	0.00513474	0.676132	0.0945604	2.80443e-05	0.799169	0.153356	0.013148	0.00157289
			n.s	n.s	*	*	n.s.	n.s.	*	n.s.						**	n.s.	n.s.	***	n.s.	n.s.	*	**
