# Supplementary material for: Membrane contact sites regulate vacuolar fission via sphingolipid metabolism
Source: eLife. 2024 Mar 27;12:RP89938. doi: 10.7554/eLife.89938 (PMC10972560; doi:10.7554/eLife.89938)
Supplement: Figure 5—source data 5. [file elife-89938-fig5-data5.xlsx]

## Sheet: Figure 5C
	Figure 5C
	＊Number of cells (classified by number of vacuoles per cell)									→	＊Re-classification into 3 groups								＊two-way ANOVA
	1st																		WT+empty	81	19	0					WT+empty	60.7843	33.3333	5.88235
			1	2	3	4	5	≧6	total				1-2	3-4	≧5	total				77.8571	19.2857	2.85714						52.9412	41.8301	5.22876
	WT+empty	none	46	35	15	4	0	0	100		WT+empty	none	81	19	0	100				84.1463	14.0244	1.82927						62.1359	35.9223	1.94175
		NaCl	24	38	19	15	3	3	102			NaCl	62	34	6	102			WT+RSB1	78.8462	15.3846	5.76923					WT+RSB1	77.1429	19.0476	3.80952
	WT+RSB1	none	50	32	11	5	3	3	104		WT+RSB1	none	82	16	6	104				80.8	18.4	0.8						77.3723	20.438	2.18978
		NaCl	51	30	15	5	3	1	105			NaCl	81	20	4	105				87.3874	10.8108	1.8018						74.7826	19.1304	6.08696
	2nd
			1	2	3	4	5	≧6	total				1-2	3-4	≧5	total			分散分析: 繰り返しのある二元配置								分散分析: 繰り返しのある二元配置
	WT+empty	none	55	54	19	8	3	1	140		WT+empty	none	109	27	4	140
		NaCl	40	41	39	25	5	3	153			NaCl	81	64	8	153			概要				合計				概要				合計
	WT+RSB1	none	77	24	21	2	1	0	125		WT+RSB1	none	101	23	1	125			WT+empty								WT+empty
		NaCl	59	47	23	5	1	2	137			NaCl	106	28	3	137			データの個数	3	3	3	9				データの個数	3	3	3	9
																			合計	243.003	52.3101	4.68641	300				合計	175.861	111.086	13.0529	300
	3rd																		平均	81.0012	17.4367	1.56214	33.3333				平均	58.6205	37.0286	4.35095	33.3333
			1	2	3	4	5	≧6	total				1-2	3-4	≧5	total			分散	9.88851	8.75331	2.09434	1330.56				分散	24.6475	18.9664	4.46	571.921
	WT+empty	none	95	43	19	4	1	2	164		WT+empty	none	138	23	3	164
		NaCl	28	36	31	6	2	0	103			NaCl	64	37	2	103			WT+RSB1								WT+RSB1
	WT+RSB1	none	65	32	10	2	0	2	111		WT+RSB1	none	97	12	2	111			データの個数	3	3	3	9				データの個数	3	3	3	9
		NaCl	53	33	17	5	6	1	115			NaCl	86	22	7	115			合計	247.034	44.5954	8.37103	300				合計	229.298	58.616	12.0863	300
																			平均	82.3445	14.8651	2.79034	33.3333				平均	76.4326	19.5387	4.02875	33.3333
																			分散	20.0273	14.6013	6.90623	1388.9				分散	2.05495	0.608251	3.83304	1091.6
	＊Ratio of cells classified into each group (%)
																			合計								合計
	none								NaCl										データの個数	6	6	6					データの個数	6	6	6
		WT+empty			WT+RSB1					WT+empty			WT+RSB1						合計	490.037	96.9055	13.0574					合計	405.159	169.702	25.1391
		1-2	3-4	≧5	1-2	3-4	≧5			1-2	3-4	≧5	1-2	3-4	≧5				平均	81.6728	16.1509	2.17624					平均	67.5265	28.2836	4.18985
	1st	81	19	0	78.8462	15.3846	5.76923		1st	60.7843	33.3333	5.88235	77.1429	19.0476	3.80952				分散	12.5077	11.3257	4.05277					分散	105.862	99.5989	3.34836
	2nd	77.8571	19.2857	2.85714	80.8	18.4	0.8		2nd	52.9412	41.8301	5.22876	77.3723	20.438	2.18978
	3rd	84.1463	14.0244	1.82927	87.3874	10.8108	1.8018		3rd	62.1359	35.9223	1.94175	74.7826	19.1304	6.08696
	average	81.0012	17.4367	1.56214	82.3445	14.8651	2.79034		average	58.6205	37.0286	4.35095	76.4326	19.5387	4.02875				分散分析表								分散分析表
	stdev.p	2.56755	2.41569	1.18162	3.65398	3.11997	2.14573		stdev.p	4.0536	3.55588	1.72434	1.17046	0.63679	1.59855				変動要因	変動	自由度	分散	観測された分散比	P-値	F 境界値		変動要因	変動	自由度	分散	観測された分散比	P-値	F 境界値
	se (3)	1.48238	1.3947	0.682208	2.10962	1.80132	1.23884		se (3)	2.34035	2.05299	0.995546	0.675763	0.367651	0.922923				標本	0	1	0	0	1	4.74723		標本	-1.81899e-12	1	-1.81899e-12	-1.99998e-13	#NUM!	4.74723
	ttest				0.692432	0.408864	0.517415		ttest				0.00395363	0.00238113	0.855785				列	21616.2	2	10808.1	1041.39	3.53382e-14	3.88529		列	12264.1	2	6132.05	674.22	4.70991e-13	3.88529
					n.s.	n.s.	n.s.						**	**	n.s.				交互作用	14.889	2	7.4445	0.7173	0.507854	3.88529		交互作用	934.908	2	467.454	51.3966	1.30494e-06	3.88529
																			繰り返し誤差	124.542	12	10.3785					繰り返し誤差	109.14	12	9.09503
	none								NaCl										合計	21755.7	17						合計	13308.1	17
	average								average
		1-2	3-4	≧5						1-2	3-4	≧5
	WT+empty	81.0012	17.4367	1.56214					WT+empty	58.6205	37.0286	4.35095
	WT+RSB1	82.3445	14.8651	2.79034					WT+RSB1	76.4326	19.5387	4.02875
	se (3)								se (3)
		1-2	3-4	≧5						1-2	3-4	≧5
	WT+empty	1.48238	1.3947	0.682208					WT+empty	2.34035	2.05299	0.995546
	WT+RSB1	2.10962	1.80132	1.23884					WT+RSB1	0.675763	0.367651	0.922923
