# Supplementary material for: Membrane contact sites regulate vacuolar fission via sphingolipid metabolism
Source: eLife. 2024 Mar 27;12:RP89938. doi: 10.7554/eLife.89938 (PMC10972560; doi:10.7554/eLife.89938)
Supplement: Supplementary file 1. — Related to all figures. [file elife-89938-supp1.xlsx]

## Sheet: Strains and Plasmids
				Supplementary File 1
				Yeast strains used in this study, Related to All Figures.
				Strain	Number	MAT	Genotype	Source
				WT (RH)	FKY2577	a	ura3 his3 leu2 trp1 lys2 bar1-1	Ikeda A et al. iScience. 2020;23(10):101603.
				tcb1Δ2Δ3Δ	FKY2927	a	RH except for tcb1Δ::TRP1 tcb2Δ::HIS3 tcb3Δ::LEU2	Ikeda A et al. iScience. 2020;23(10):101603.
				tcb1Δ	FKY2909	a	RH except for tcb1Δ::TRP1	Ikeda A et al. iScience. 2020;23(10):101603.
				tcb2Δ	FKY3819	alpha	RH except for tcb2Δ::HIS3	Ikeda A et al. iScience. 2020;23(10):101603.
				tcb3Δ	FKY2924	a	RH except for tcb3Δ::LEU2	Ikeda A et al. iScience. 2020;23(10):101603.
				tcb1Δ2Δ	FKY3023	a	RH except for tcb1Δ::TRP1 tcb2Δ::HIS3	Ikeda A et al. iScience. 2020;23(10):101603.
				tcb1Δ3Δ	FKY3820	alpha	RH except for tcb1Δ::TRP1 tcb3Δ::LEU2	Ikeda A et al. iScience. 2020;23(10):101603.
				tcb2Δ3Δ	FKY3008	a	RH except for tcb2Δ::HIS3 tcb3Δ::LEU2	Ikeda A et al. iScience. 2020;23(10):101603.
				TCB3(Full)-GBP	FKY3903	a	RH except for TCB3-GBPΔ::KanMX	This study
				TCB3(TM-SMP)-GBP	FKY3904	a	RH except for TCB3(1F-489R)-GBP::KanMX	This study
				TCB3(TM)-GBP	FKY3905	a	RH except for TCB3(1F-259R)-GBP::KanMX	This study
				tcb1Δ2Δ TCB3(TM)-GBP	FKY4754	a	RH except for tcb1Δ::TRP1 tcb2Δ::HIS3 TCB3(1F-259R)::KanMX	This study
				WT	FKY36 / RH4423	alpha	RH except for HIS3+ TRP1+ LYS2+ pep4-3	Funato K et al. J Biol Chem. 2003;278(9):7325-7334.
				lcb3Δ	FKY37 / RH4427	alpha	RH except for lcb3Δ::KanMX HIS3+ LEU2+ TRP1+ LYS2+ pep4-3	Funato K et al. J Biol Chem. 2003;278(9):7325-7334.
				lcb4Δ5Δ	FKY33 / RH4402	alpha	RH except for lcb4Δ::URA3 lcb5Δ::LEU2 HIS3+ TRP1+ LYS2+ pep4-3	Funato K et al. J Biol Chem. 2003;278(9):7325-7334.
				lcb3Δ4Δ5Δ	FKY38 / RH4464	alpha	RH except for lcb3Δ::kanMX lcb4Δ::URA3 lcb5Δ::LEU2 HIS3+ TRP1+ LYS2+ pep4-3	Funato K et al. J Biol Chem. 2003;278(9):7325-7334.
				sec18-20	FKY2929	alpha	RH except for sec18-20 LYS2+	Ikeda A et al. iScience. 2020;23(10):101603.
				WT (RH)	FKY6187	alpha	ura3 his3 leu2 trp1 lys2 bar1-1	This study
				nvj1Δ	FKY6189	a	RH except for nvj1Δ::HIS3	This study
				tcb3Δ	FKY6190	alpha	RH except for tcb3Δ::LEU2	This study
				tcb3Δnvj1Δ	FKY6188	a	RH except for tcb3Δ::LEU2 nvj1Δ::HIS3	This study
				tcb3Δnvj1Δ2Δ3Δmdm1Δ	FKY6409	a	RH except for nvj1Δ:: URA3 nvj2Δ::KanMX nvj3Δ::HIS3 mdm1Δ::KanMX tcb3Δ::LEU2	This study
				nvj1Δ2Δ3Δ	FKY6410	a	RH except for nvj1Δ:: URA3 nvj2Δ::KanMX nvj3Δ::HIS3	This study
				WT (W303)	FKY5687 / RL1	a	his3-11,15 leu2-3,112 trp1-1 ura3-1 ade2-1 can1-100 GAL+ bar-	Lucena R et al. Curr Biol. 2018;28(2):196-210.
				lag1Δlac1Δ	FKY5688 / RL40	a	W303 except for lag1Δ::KanMX6 lac1Δ::HIS	Lucena R et al. Curr Biol. 2018;28(2):196-210.
				WT (BY4742)	FKY3340	alpha	his3Δ1 leu2Δ0 lys2Δ0 ura3Δ0	Open biosystem, inc
				lag1Δ	YKC121-59	alpha	BY4742 except for lag1Δ::KanMx	Open biosystem, inc
				vma3Δ	YKC112-01	alpha	BY4742 except for vma3Δ::KanMx	Open biosystem, inc
				vps4Δ	YKC124-58	alpha	BY4742 except for vps4Δ::KanMx	Open biosystem, inc
				fab1Δ	YKC145-21	alpha	BY4742 except for fab1Δ::KanMx	Open biosystem, inc
				vac14Δ	YKC149-61	alpha	BY4742 except for vac14Δ::KanMx	Open biosystem, inc
				TCB3-HA pep4Δ	FKY3209	alpha	BY4742 except for TCB3-HA::HIS3 pep4Δ::KanMx	This study
				WT (SEY6210)	FKY3868	alpha	ura3-52 leu2-3,112 his3-Δ100 trp1-Δ901 lys2-801 suc2-Δ9	Yabuki Y et al. Genetics. 2019;212(1):175-186.
				ΔNVJ	FKY5560	alpha	SEY6210 except for nvj1Δ::TRP1 nvj2Δ::HIS3 nvj3Δ::NatMX mdm1Δ::KanMX	Henne WM et al. J Cell Biol. 2015;210(4):541-551.
