# Supplementary material for: Membrane contact sites regulate vacuolar fission via sphingolipid metabolism
Source: eLife. 2024 Mar 27;12:RP89938. doi: 10.7554/eLife.89938 (PMC10972560; doi:10.7554/eLife.89938)
Supplement: Supplementary file 2. — Related to all figures. [file elife-89938-supp2.xlsx]

## Sheet: Strains and Plasmids
				Supplementary File 2
				Plasmids used in this study, Related to All Figures.
				Plasmid	Number	Relevant information	Source
				pRS426-TDH3	FKP51	2μ, yeast TDH3 promoter, empty, URA3	Mumberg D et al., Gene. 1995;156(1):119-122
				pRS426-TDH3/RSB1	FKP1065	2μ, yeast TDH3 promoter, RSB1, URA3	This study
				pRS316/PTDH3-EGFP-CPS1-TCMK1	FKP621	CEN, yeast TDH3 promoter, GFP-CPS1, URA3	Provided by Riezman H
				pRS416GPD/GFP	FKP851	CEN, yeast TDH3 promoter, GFP, URA3	This study
				pRS416GPD/TCB1-GFP	FKP1127	CEN, yeast TDH3 promoter, TCB1-GFP, URA3	This study
				pRS416GPD/TCB2-GFP	FKP1131	CEN, yeast TDH3 promoter, TCB2-GFP, URA3	This study
